# Supplementary material for: Changes in air pollutant emissions in China during two clean-air action periods derived from the newly developed Inversed Emission Inventory for Chinese Air Quality (CAQIEI)
Source: Copernicus journal article supplement (doi:10.5194/essd-16-4351-2024), 2024-09-26
Supplement: Supplementary file 1 [file essd-16-4351-2024-supplement.pdf]

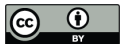

*Supplement of*

**Changes in air pollutant emissions in China during two clean-air action periods derived from the newly developed Inversed Emission Inventory for Chinese Air Quality (CAQIEI)**

**Lei Kong et al.**

*Correspondence to:* Xiao Tang ([tangxiao@mail.iap.ac.cn](mailto:tangxiao@mail.iap.ac.cn)) and Zifa Wang ([zifawang@mail.iap.ac.cn](mailto:zifawang@mail.iap.ac.cn))

The copyright of individual parts of the supplement might differ from the article licence.

# Supplementary Material

## Text S1: Evaluation of the meteorological simulation

The performance of meteorological simulation is important for the inversion estimation since the meteorological parameters influence the transport, chemical and removal process of air pollutants and affect the estimation of flow-dependent background error covariance. Figure S18–S23 presents the comparisons of the simulated meteorological parameters, including zonal wind (U), meridional wind (V), temperature (T), relative humidity (RH) and precipitation, against the observations obtained from China Meteorological Administration (Figure S24). Evaluation statistics of meteorological simulation are also presented in Table S1. It shows that the WRF simulation can generally capture the main features of the different meteorological parameters over the different regions of China. The calculated correlation coefficient is 0.49–1.00 for different parameters, and the values of MB (RMSE) are -0.36–0.01 (0.3–0.52) m/s for U, -0.37–0.32 (0.32–0.80) m/s for V, -1.11–1.11 (0.6–2.17) °C for T, -11.2 to -2.59 (6.94–12.06) % for RH, and -2.05–37.35 (5.45–61.62) mm for precipitation. This suggests WRF simulation generally well reproduce the meteorological conditions for all regions of China, which is acceptable for the inversion estimates.

## Text S2: Assessment of the influences of site differences on the emission inversions

The emission increments at the observation sites (a posteriori minus a priori) for different species in China from 2013 to 2015 under the scenarios of fixed observation sites (blue lines) and varying observation sites (orange) were calculated to assess the influences of the site differences on the emission inversions (Fig. S2). In the fixed-site scenario, it is assumed that the number of observation sites remains constant at the 2013 level while in the varying-site scenario, the number of observation sites increases over time. The differences in emission increments between these two scenarios are used to analyze the impact of changes in the observation coverage on the emission inversions. Please note that, to simplify calculations, we only computed the emission increments at the locations of observation sites. Therefore, they may not be equal to the emission increments calculated for the entire grid as reported in the paper. However, they are still useful indicators for the effects of emission inversion. In addition, since we did not consider the temporal variation in the a priori emissions, the changes of the emission increments can be used to approximate the temporal variations of the a posterior emissions. It can be clearly seen that there are obvious differences in the emission increments between the two scenarios. The emission increment is larger in the varying-site scenario than that in the fixed-site scenario for all species due to the increases of observation sites. Moreover, as indicated in Fig. S2, the changes of observation sites were shown to significantly affect the estimation of the emission trend in 2013 and 2014. Most of species showed decreasing trends in their inversed emission under the fixed-site scenario. However, under the varying-site scenario, the decreasing trends were smaller for PM<sub>2.5</sub>, NO<sub>x</sub> and NMVOC, and the emissions of PM<sub>10</sub> and CO even showed increasing trends. This is due to that the emission increments were positive over most of observation sites for these species as demonstrated in Fig.3. Thus, the increases of observation

32 site would lead to increases of positive emission increments and higher a posteriori emissions, which may counteract the decreasing  
33 trends or even lead to an opposite trend. These results provide the evidences that the increasing trends in the total emissions of PM<sub>10</sub>  
34 and CO from 2013 to 2015 seen in Fig. 6 and Fig. 7 are highly likely to be a spurious trend caused by the changes of observation  
35 coverage. The weak emission changes in PM<sub>2.5</sub> and NO<sub>x</sub> (Fig. 6 and Fig. 7) may also be related to the changes in the number of  
36 observation sites. The SO<sub>2</sub> emission is an except that its calculated trend is larger under the varying-site scenario than that under the  
37 fixed-site scenario. This is because that the emission increment for the SO<sub>2</sub> is generally negative over the most sites, thus the  
38 increased observation sites would lead to larger decreasing trend in the inversed emissions of SO<sub>2</sub>. To date, these results highlighted  
39 the significant influences of the site differences on the estimated emissions and their trends. Therefore, we recommend not to use  
40 the emission in 2013 and 2014 when analyze the trends of the emissions.

### 42 **Text S3: Comparisons of model performance driven by CAQIEI with that driven by more recent bottom-up emission** 43 **inventories**

44 To obtain a better understanding of the accuracy of our inverse emission inventory, we conducted a one-year simulation of air  
45 pollution in China for year 2020 with more recent bottom-up emission inventories and compared its performance with that driven  
46 by the CAQIEI. The used bottom-up inventories in this simulation case includes the HTAPv3 (Crippa et al., 2023) inventory for the  
47 anthropogenic emissions outside China with a base year of 2018; the MEIC inventory for the anthropogenic emissions over China  
48 with a base year of 2020; the CAMS emission inventory ([https://ads.atmosphere.copernicus.eu/cdsapp#!/dataset/cams-global-](https://ads.atmosphere.copernicus.eu/cdsapp#!/dataset/cams-global-emission-inventories?tab=overview)  
49 [emission-inventories?tab=overview](https://ads.atmosphere.copernicus.eu/cdsapp#!/dataset/cams-global-emission-inventories?tab=overview), last access: 19 June 2024) for the biogenic, soil and oceanic emissions; and the Global Fire  
50 Assimilation System (GFAS) (Kaiser et al., 2012) for the biomass burning emissions. Note that since the MEIC emission inventory  
51 does not include the ship, air and waste emissions. Emissions from these sectors over China were provided by the HTAPv3 emission  
52 inventory. For clarity, in following content, we name this simulation case as the MEIC-HTAPv3 based on the anthropogenic  
53 emission inventory used.

54 Figure S25 shows the time series of hourly concentrations of different air pollutants in China obtained from observation and  
55 simulation driven by the CAQIEI and more recent bottom-up inventories. Comparisons of the evaluation statistics of these two  
56 simulation scenarios are also presented in Table S3. It shows that updating the bottom-up emission inventories to a more recent year  
57 does improve the model performance compared to the outdated a priori emission inventory (Table 2), suggesting that the bottom-  
58 up emission inventory has to some extent captured the changes of air pollutant emissions in China. It is also encouraging to find  
59 that the model performance driven by CAQIEI and MEIC-HTAPv3 is similar for the PM<sub>2.5</sub>, PM<sub>10</sub>, and SO<sub>2</sub> over the NCP, NE, SE  
60 and SW regions, both significantly improved from the a priori emission inventory. This suggest that both the top-down and recent  
61 bottom-up emission inventories have good performance in capturing the emission changes of these species over these regions and  
62 they yield consistent estimations. However, the model simulation driven by MEIC-HTAPv3 still have negative biases in the CO  
63 concentrations possibly due to the underestimations of CO emissions as we illustrated in Sect.4.3.1.3. Similarly, due to the errors in

64 the dust emission, there are negative biases in the simulated PM<sub>2.5</sub> and PM<sub>10</sub> concentrations over the western China driven by MEIC-  
65 HTAPv3. On the contrary, the simulated NO<sub>2</sub> concentrations in MEIC-HTAPv3 are higher than the observations over the NCP, NE  
66 and SE regions, which also partly contributes to the underestimated O<sub>3</sub> concentrations over these regions. The CAQIEI generally  
67 achieves better performance in simulating the air pollutant concentrations in China as indicated by higher values of correlation  
68 coefficient and lower values of bias and root mean square of error in the model simulation driven by CAQIEI than that driven by  
69 MEIC-HTAPv3 (Table S3).

70

71

72

73

74

75

76

77

78

79

80

81

82

83

84

85

86

87

88

89

90

91

92

93

94

95

96

| Region  | U (m/s) |       |      | V (m/s) |       |      | T (°C) |       |      | RH (%) |        |       | Precipitation (mm/month) |       |       |
|---------|---------|-------|------|---------|-------|------|--------|-------|------|--------|--------|-------|--------------------------|-------|-------|
|         | R       | MB    | RMSE | R       | MB    | RMSE | R      | MB    | RMSE | R      | MB     | RMSE  | R                        | MB    | RMSE  |
| NCP     | 0.95    | 0.01  | 0.30 | 0.95    | -0.02 | 0.49 | 1.00   | -0.42 | 0.84 | 0.95   | -11.24 | 11.66 | 0.95                     | 3.74  | 18.56 |
| NE      | 0.94    | 0.37  | 0.51 | 0.89    | -0.08 | 0.49 | 0.99   | -1.11 | 2.17 | 0.77   | -2.59  | 7.18  | 0.97                     | 12.09 | 19.76 |
| SE      | 0.84    | -0.27 | 0.37 | 0.98    | -0.37 | 0.80 | 1.00   | -0.40 | 0.60 | 0.88   | -7.00  | 7.58  | 0.94                     | 37.35 | 61.62 |
| SW      | 0.63    | -0.44 | 0.52 | 0.69    | 0.04  | 0.37 | 0.99   | 1.11  | 1.27 | 0.87   | -5.84  | 6.94  | 0.92                     | 16.85 | 40.18 |
| NW      | 0.49    | -0.36 | 0.51 | 0.58    | 0.32  | 0.43 | 0.99   | 0.83  | 1.91 | 0.79   | -9.49  | 12.06 | 0.51                     | -2.05 | 5.45  |
| CENTRAL | 0.95    | 0.10  | 0.41 | 0.70    | -0.08 | 0.32 | 1.00   | -0.27 | 0.93 | 0.85   | -8.59  | 10.30 | 0.97                     | 4.64  | 10.87 |

98

99 **Table S2 The average mean (standard deviation) of the calculated factor for the inflation of the ensemble member over**  
100 **different regions of China for different species**

|                   | NCP       | NE        | SE        | SW            | NW          | Central     |
|-------------------|-----------|-----------|-----------|---------------|-------------|-------------|
| PM <sub>2.5</sub> | 1.0 (0.2) | 1.7 (1.6) | 1.0 (0.0) | 6.8 (8.5)     | 3.1 (3.8)   | 3.9 (3.9)   |
| PM <sub>10</sub>  | 1.4 (0.7) | 7.2 (8.0) | 2.4 (0.8) | 78.1 (108.2)  | 26.3 (36.5) | 36.0 (49.0) |
| SO <sub>2</sub>   | 1.4 (0.7) | 4.1 (3.2) | 2.3 (0.8) | 176.1 (254.6) | 7.8 (6.5)   | 58.6 (72.5) |
| NO <sub>x</sub>   | 1.0 (0.1) | 1.7 (0.7) | 1.2 (0.3) | 8.1 (5.3)     | 2.8 (1.3)   | 5.4 (4.1)   |
| CO                | 1.0 (0.1) | 2.8 (2.3) | 1.4 (0.4) | 18.8 (16.8)   | 6.8 (6.9)   | 8.6 (10.0)  |
| NMVOC             | 1.4 (0.6) | 4.5 (4.4) | 1.6 (0.5) | 8.1 (8.6)     | 6.5 (5.8)   | 8.1 (10.1)  |

101

102

103 **Table S3: Evaluation statistics of the model simulation driven by CAQIEI (outside brackets) and more recent bottom-up**  
104 **inventories (inside brackets) in 2020**

|         | PM <sub>2.5</sub><br>( $\mu\text{g}/\text{m}^3$ ) | PM <sub>10</sub><br>( $\mu\text{g}/\text{m}^3$ ) | SO <sub>2</sub><br>( $\mu\text{g}/\text{m}^3$ ) | NO <sub>2</sub><br>( $\mu\text{g}/\text{m}^3$ ) | CO<br>( $\text{mg}/\text{m}^3$ ) | O <sub>3</sub><br>( $\mu\text{g}/\text{m}^3$ ) |
|---------|---------------------------------------------------|--------------------------------------------------|-------------------------------------------------|-------------------------------------------------|----------------------------------|------------------------------------------------|
| R       | 0.77 (0.53)                                       | 0.73 (0.44)                                      | 0.37 (0.19)                                     | 0.69 (0.45)                                     | 0.67 (0.40)                      | 0.75 (0.48)                                    |
| MB      | 3.6 (5.3)                                         | -0.3 (-14.9)                                     | 0.3 (0.7)                                       | -0.9 (6.7)                                      | -0.06 (-0.4)                     | 6.3 (-13.7)                                    |
| NMB (%) | 10.5 (15.8)                                       | -0.5 (-25.9)                                     | 2.6 (7.6)                                       | -3.4 (26.2)                                     | -8.9 (-52.7)                     | 10.2 (-22.1)                                   |
| RMSE    | 24.6 (34.2)                                       | 37.4 (49.1)                                      | 10.9 (13.6)                                     | 15.9 (25.1)                                     | 0.4 (0.6)                        | 30.3 (42.3)                                    |

105

106

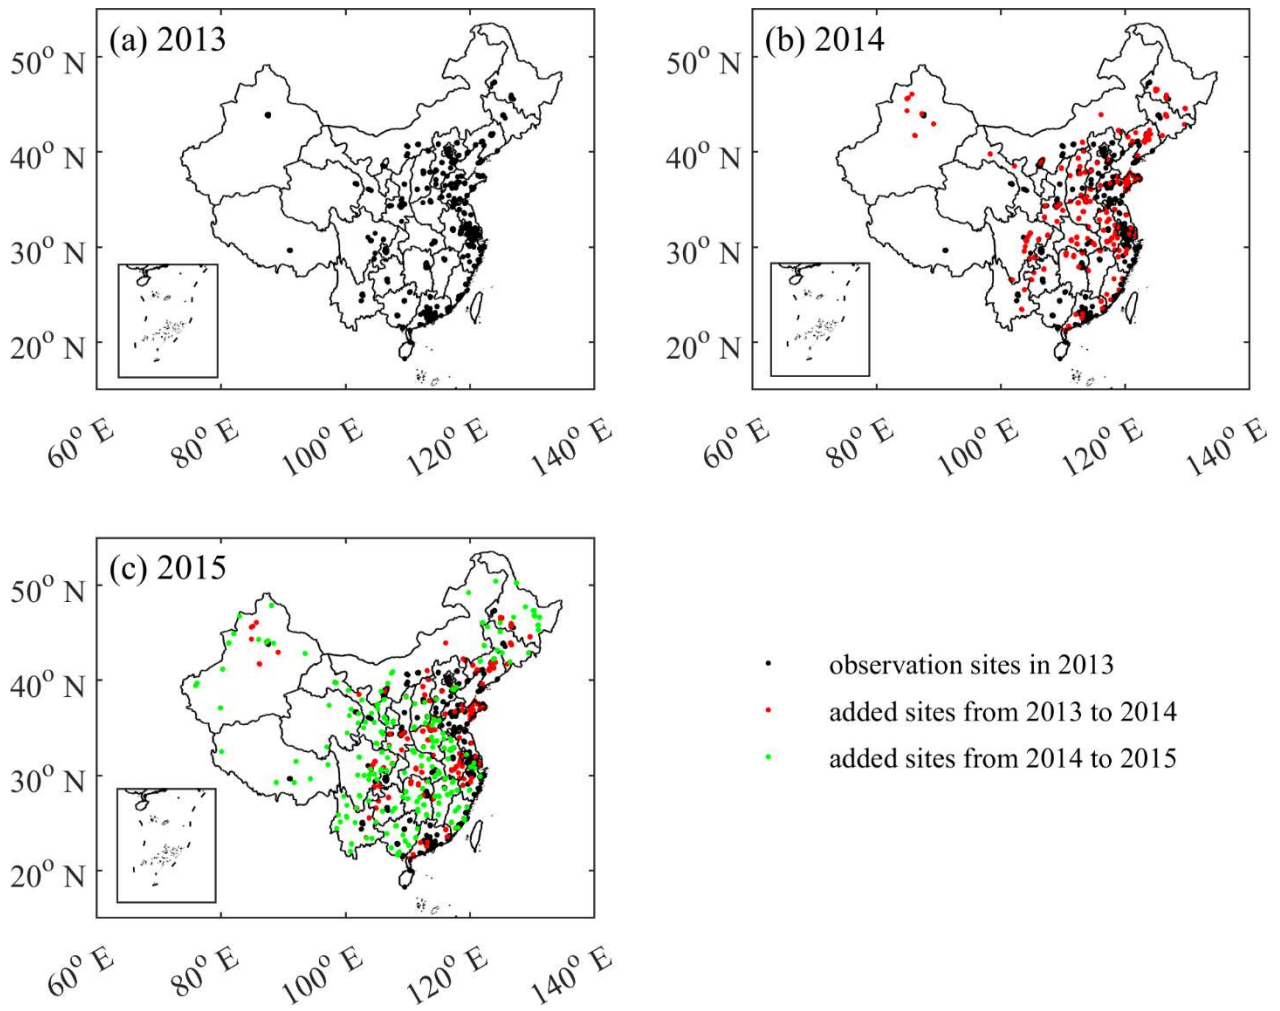

107

108

109

110

**Figure S1: Spatial distributions of observation sites in (a) 2013, (b) 2014 and (c) 2015. The observation sites in 2013 were marked as black dots, while the added observation sites from 2013 to 2014 and those from 2014 to 2015 were marked as red and green dots, respectively.**

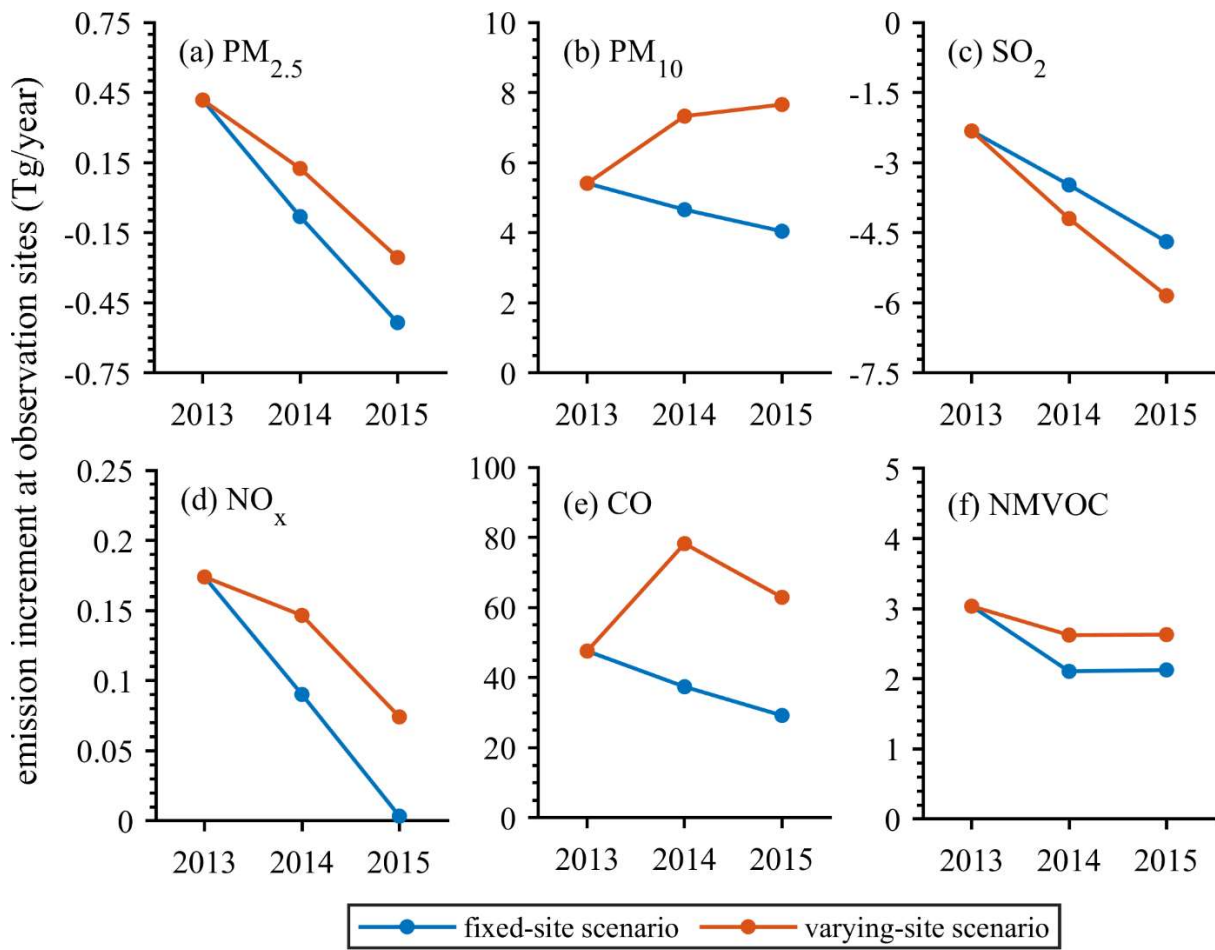

Figure S2: The calculated total emission increments at the observation sites for different species under the fixed-site scenario and varying-site scenario.

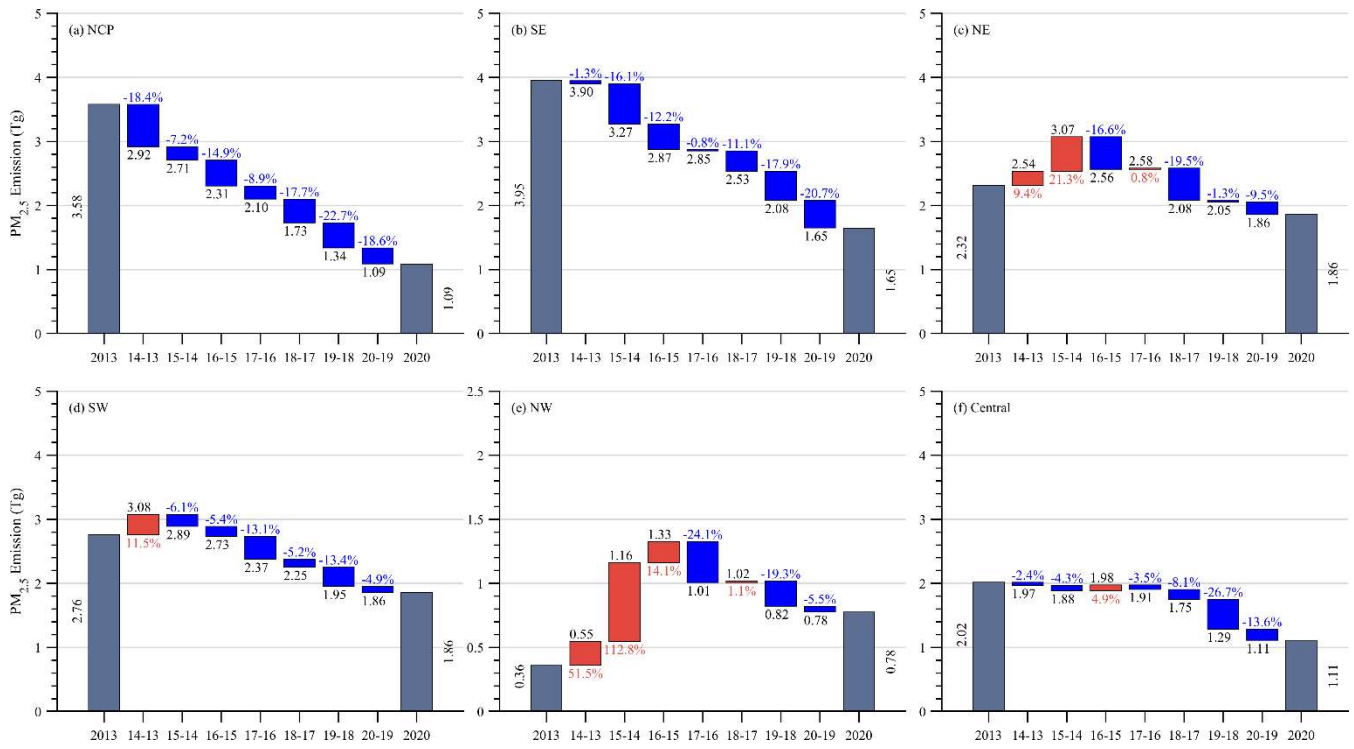

Figure S3: Emission changes of PM<sub>2.5</sub> from 2013 to 2020 over different regions of China obtained from CAQIEL.

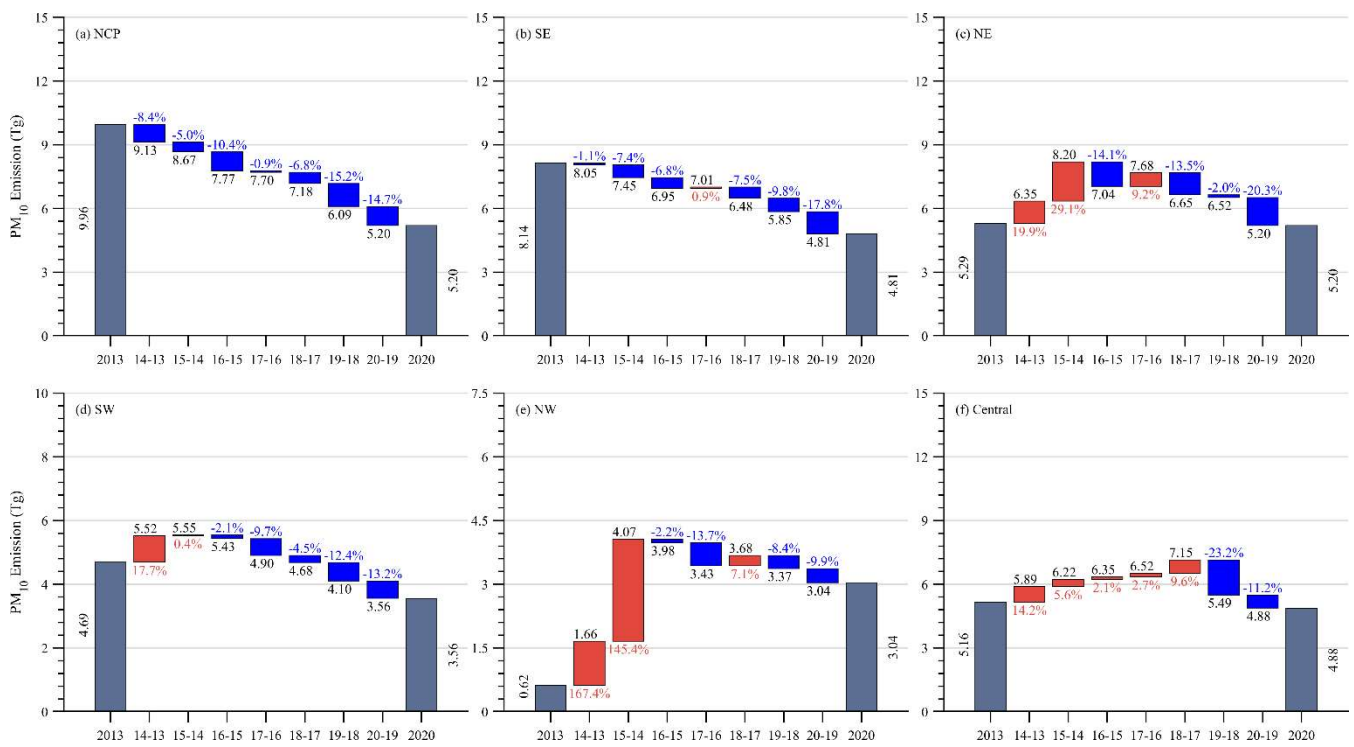

Figure S4: Same as Fig. S3 but for PM<sub>10</sub>.



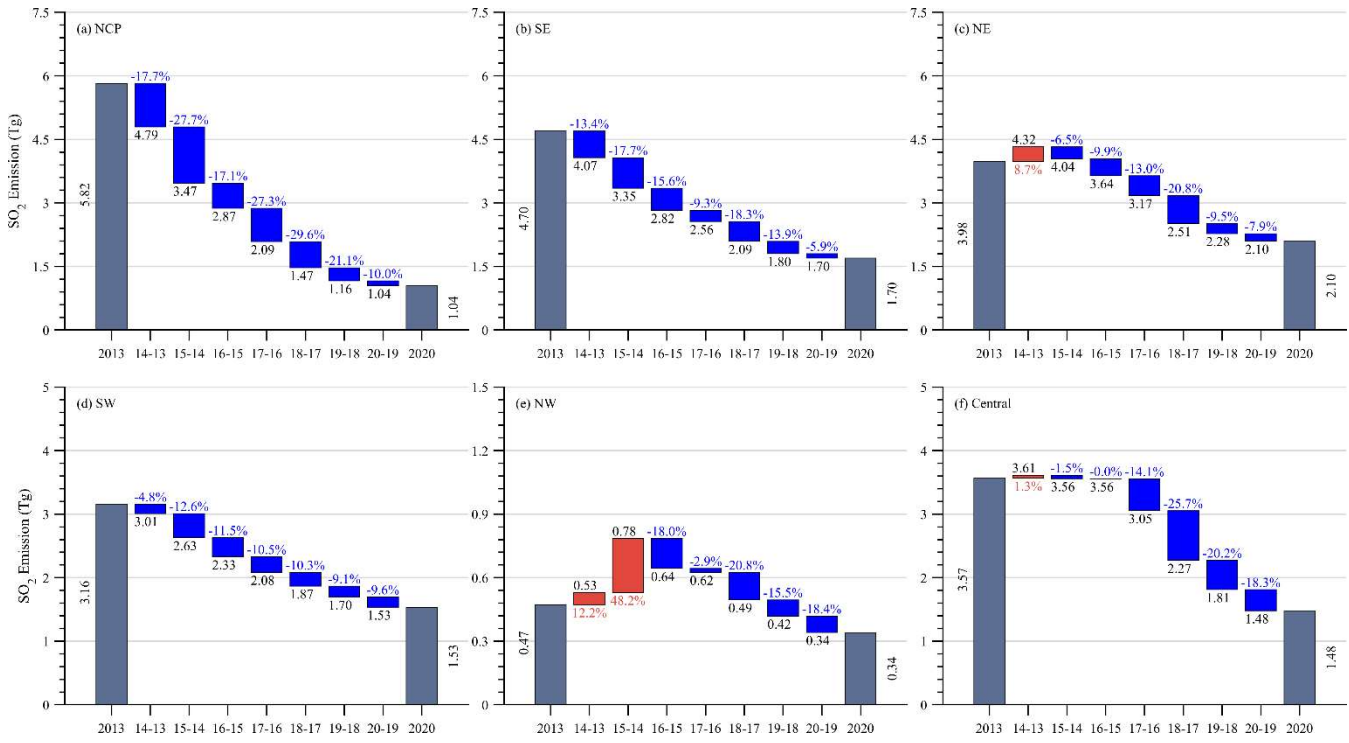

Figure S5: Same as Fig. S3 but for SO<sub>2</sub>.

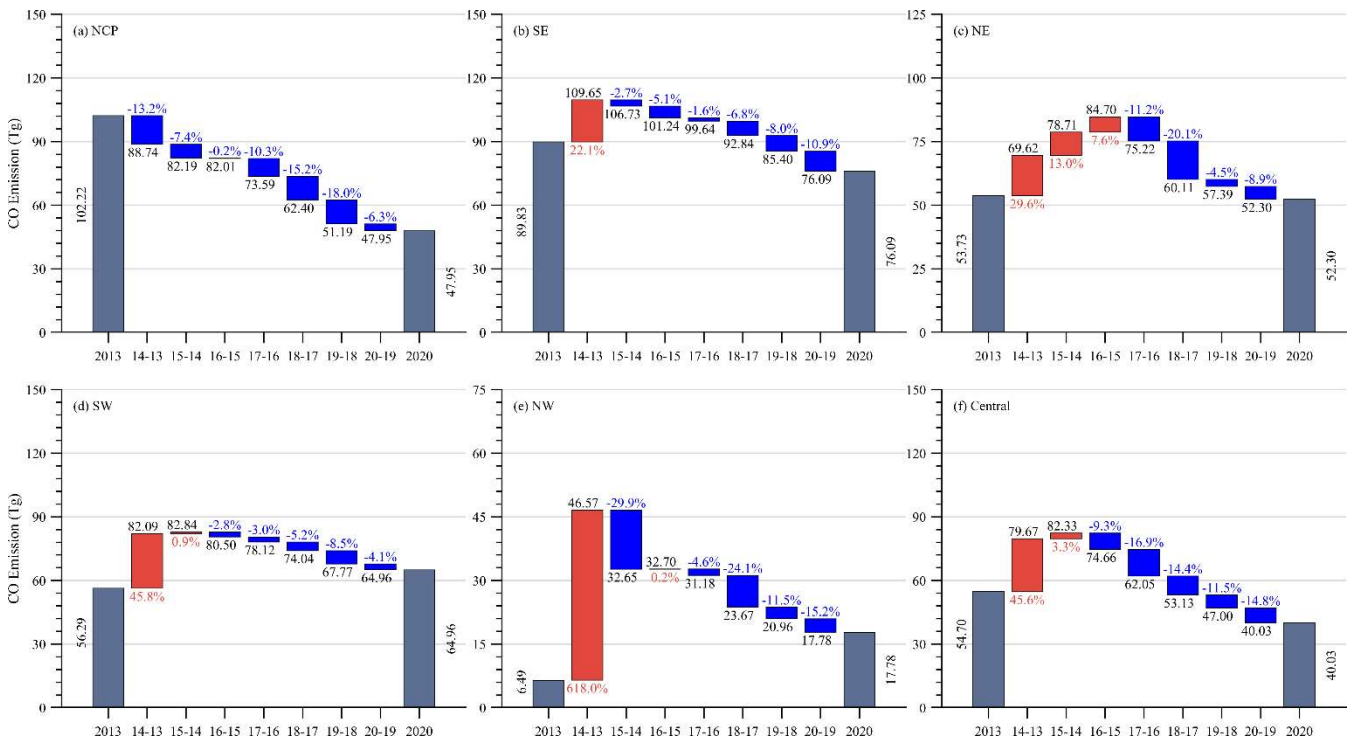

Figure S6: Same as Fig. S3 but for CO.

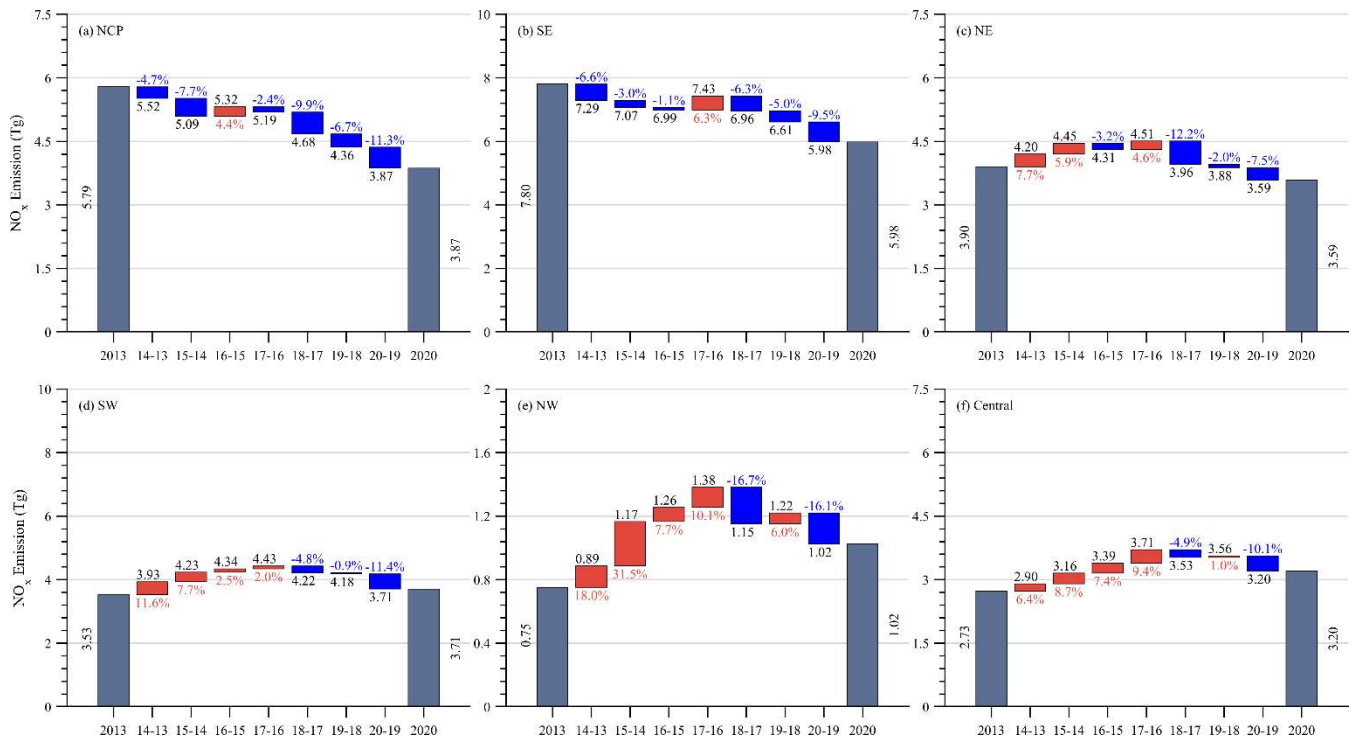

Figure S7: Same as Fig. S3 but for NO<sub>x</sub>.

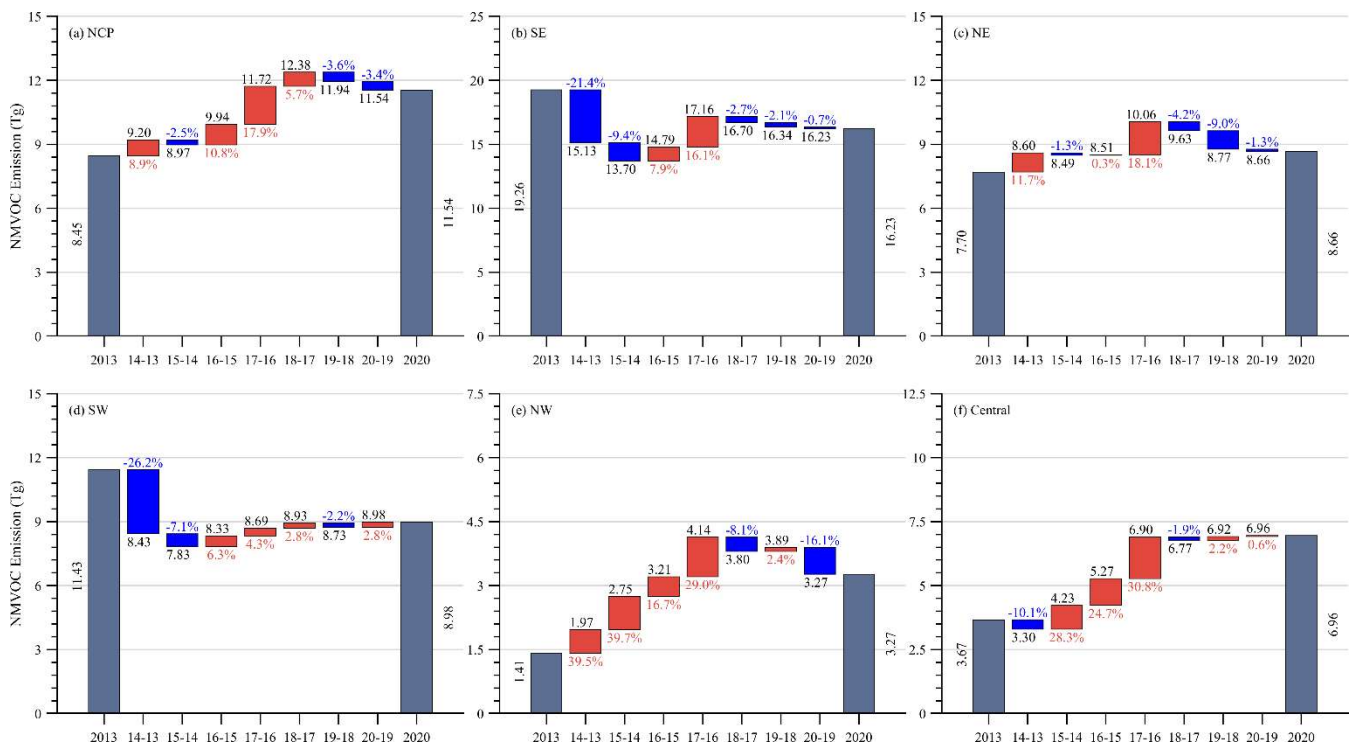

Figure S8: Same as Fig. S3 but for NMVOC.

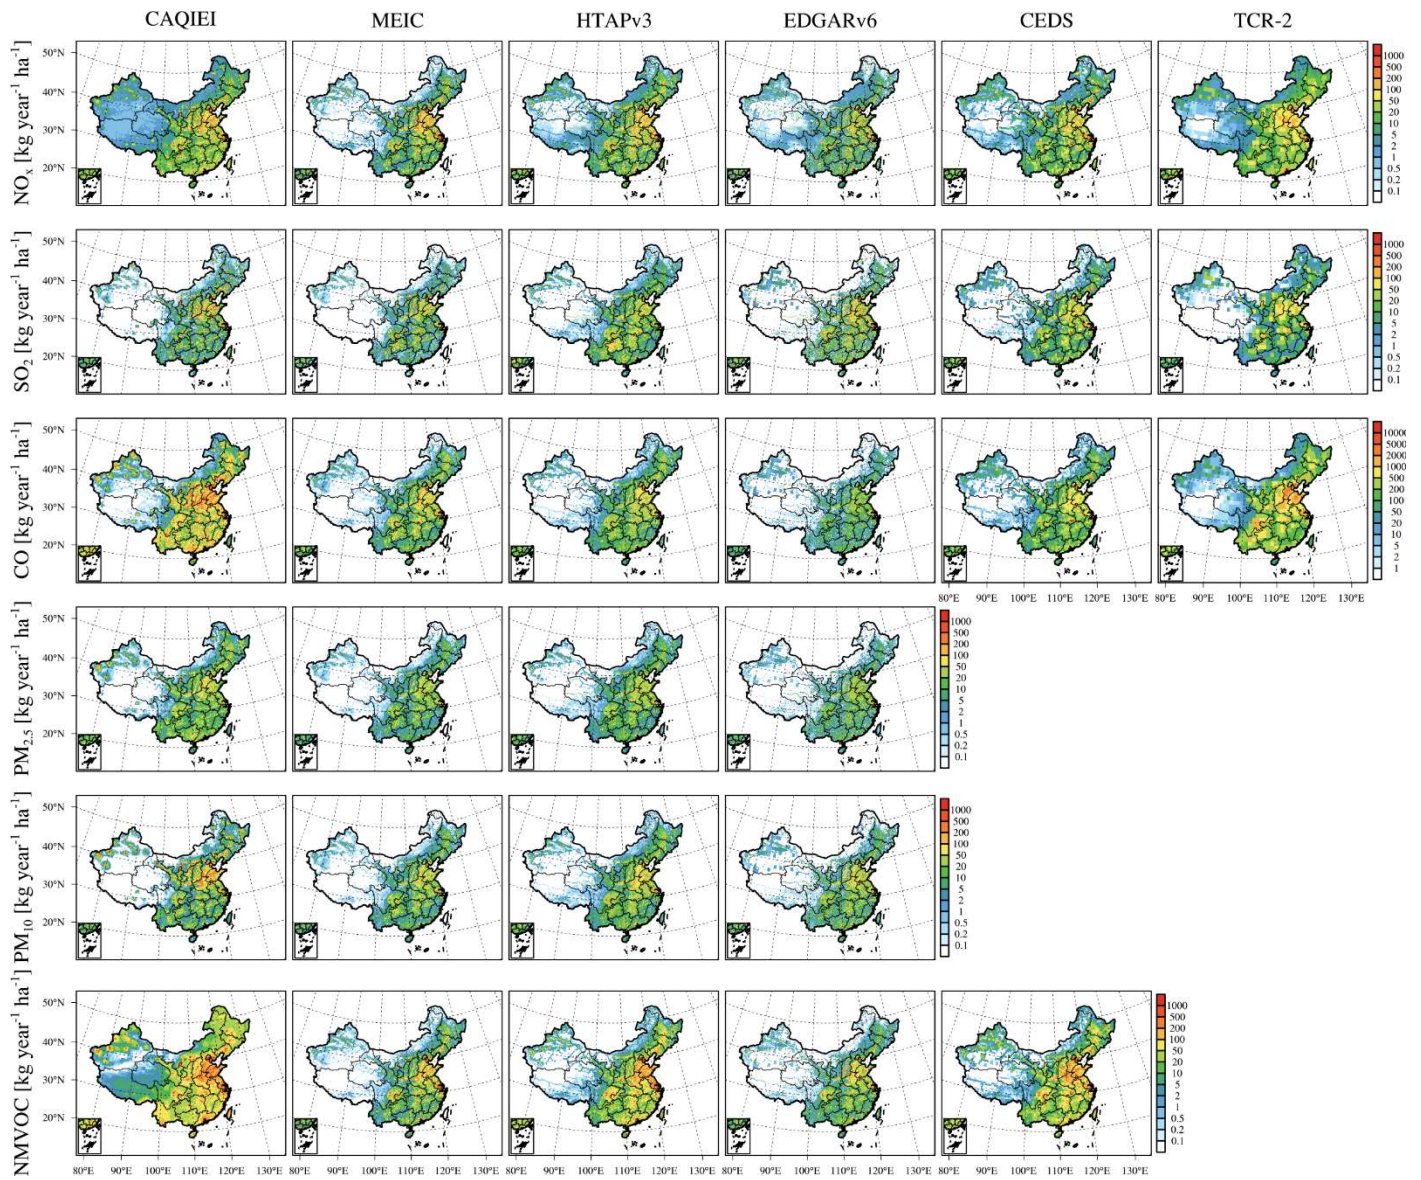

141 **Figure S9: Spatial distributions of the averaged emissions of different air pollutants in China during 2015–2018 obtained from CAQIEI,**  
 142 **MEIC, HTAPv3, EDGARv6, CEDS and TCR-2. Note the due to absence of gridded products of the ABA-CAS inventory, we did not provide**  
 143 **its spatial distributions. Also, the natural sources were not added to the previous emission inventories in this figure because of the different**  
 144 **spatial resolutions among these inventories.**  
 145

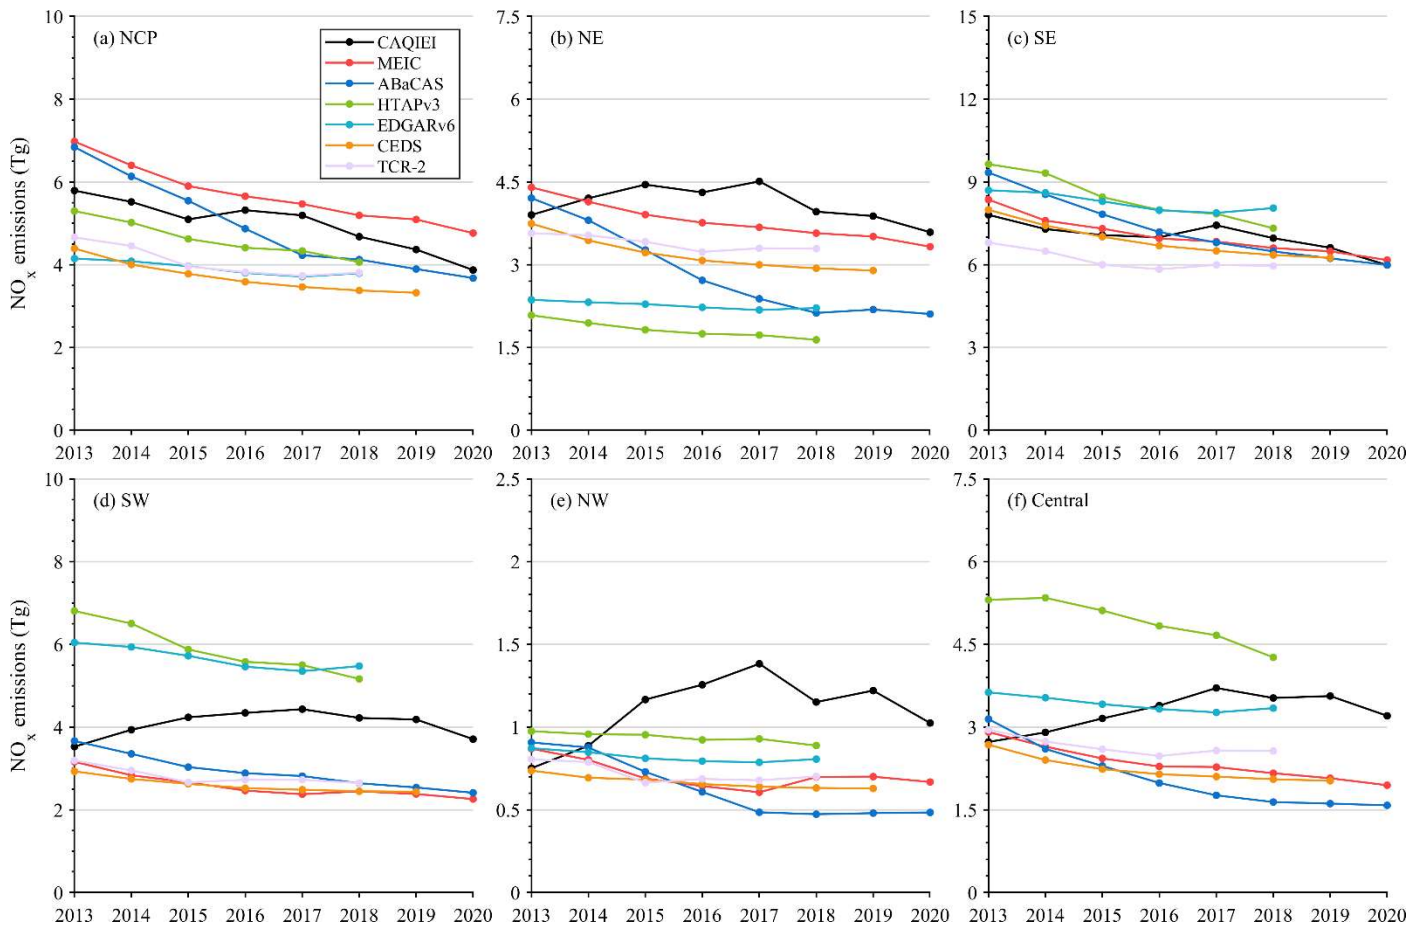

147  
 148 **Figure S10: Time series of annual NO<sub>x</sub> emissions over of different regions of China: (a) NCP, (b) NE, (c) SE, (d) SW, (e) NW and (f)**  
 149 **Central from 2013 to 2020 obtained from CAQIEI and previous inventories. Note that the natural sources were not included in the**  
 150 **previous inventories in this figure.**

147  
 148  
 149  
 150  
 151  
 152

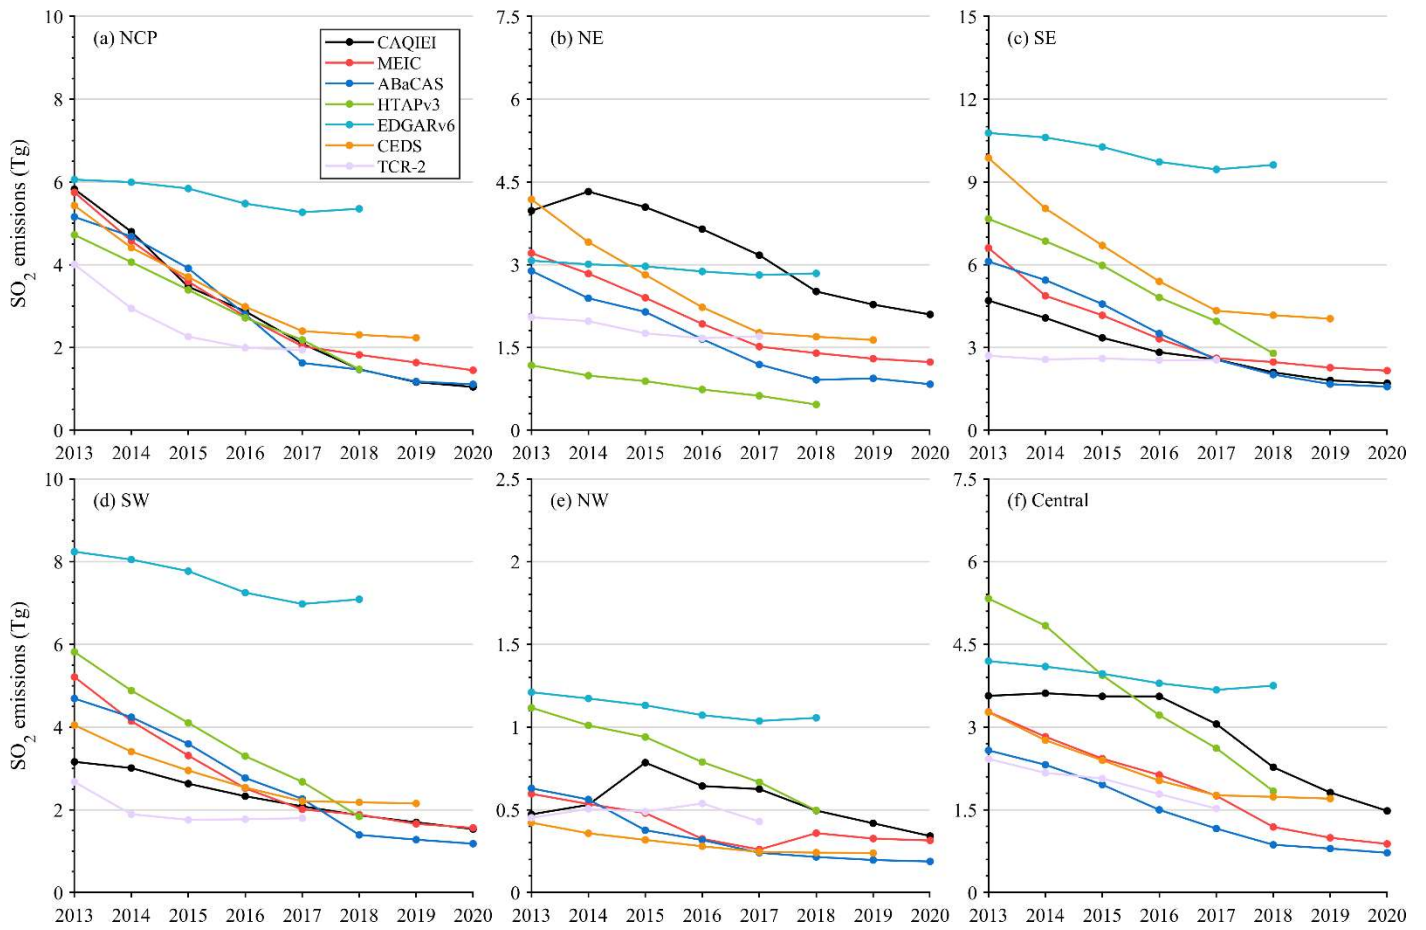

Figure S11: Same as Fig. S10 but for SO<sub>2</sub>.

153  
154

155  
156

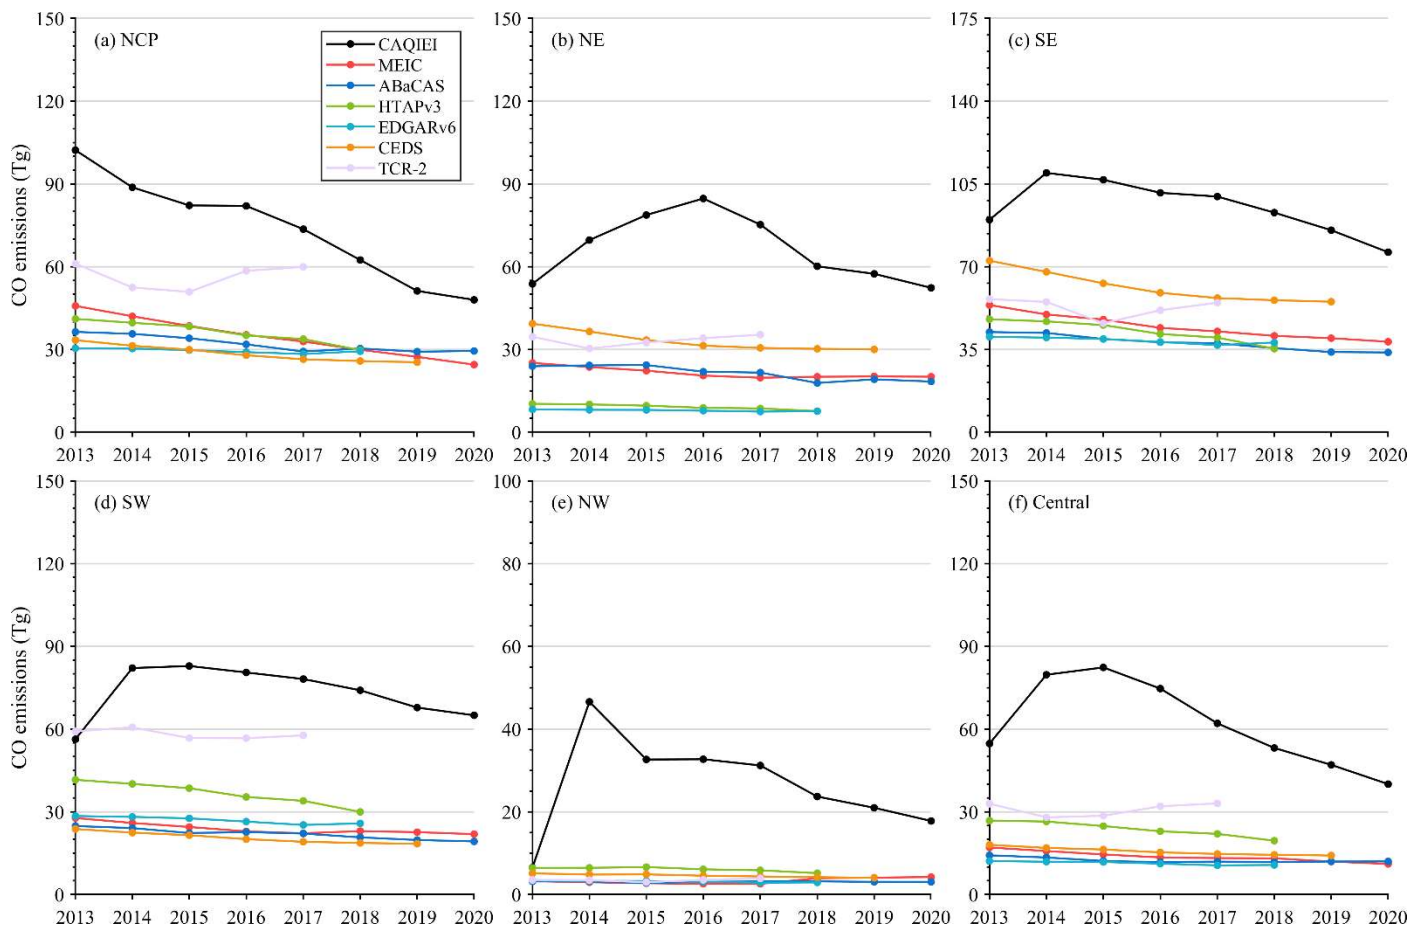

Figure S12: Same as Fig. S10 but for CO.

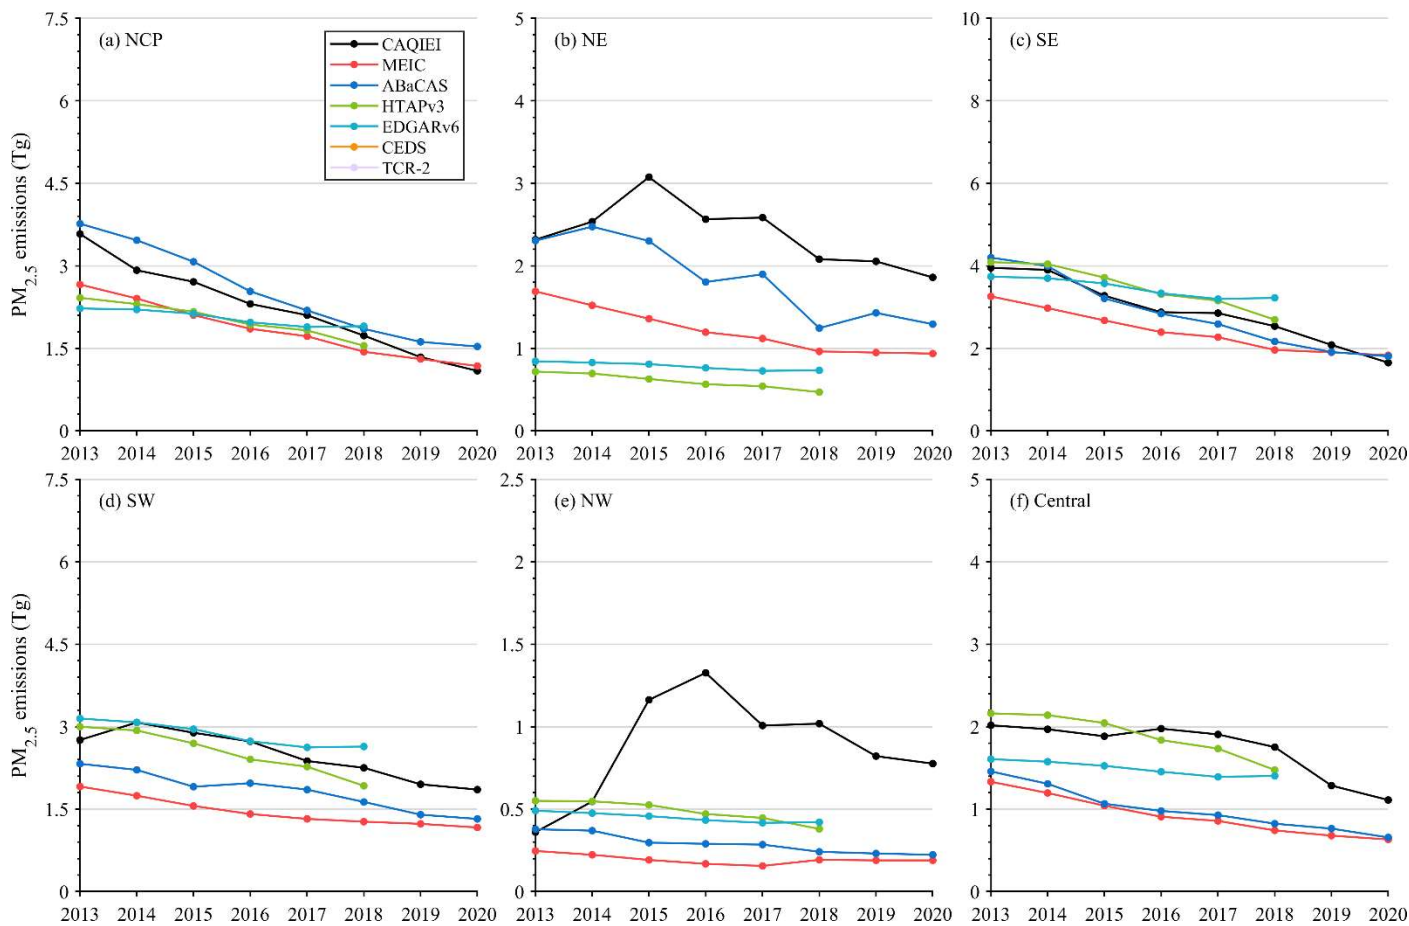

Figure S13: Same as Fig. S10 but for PM<sub>2.5</sub>.

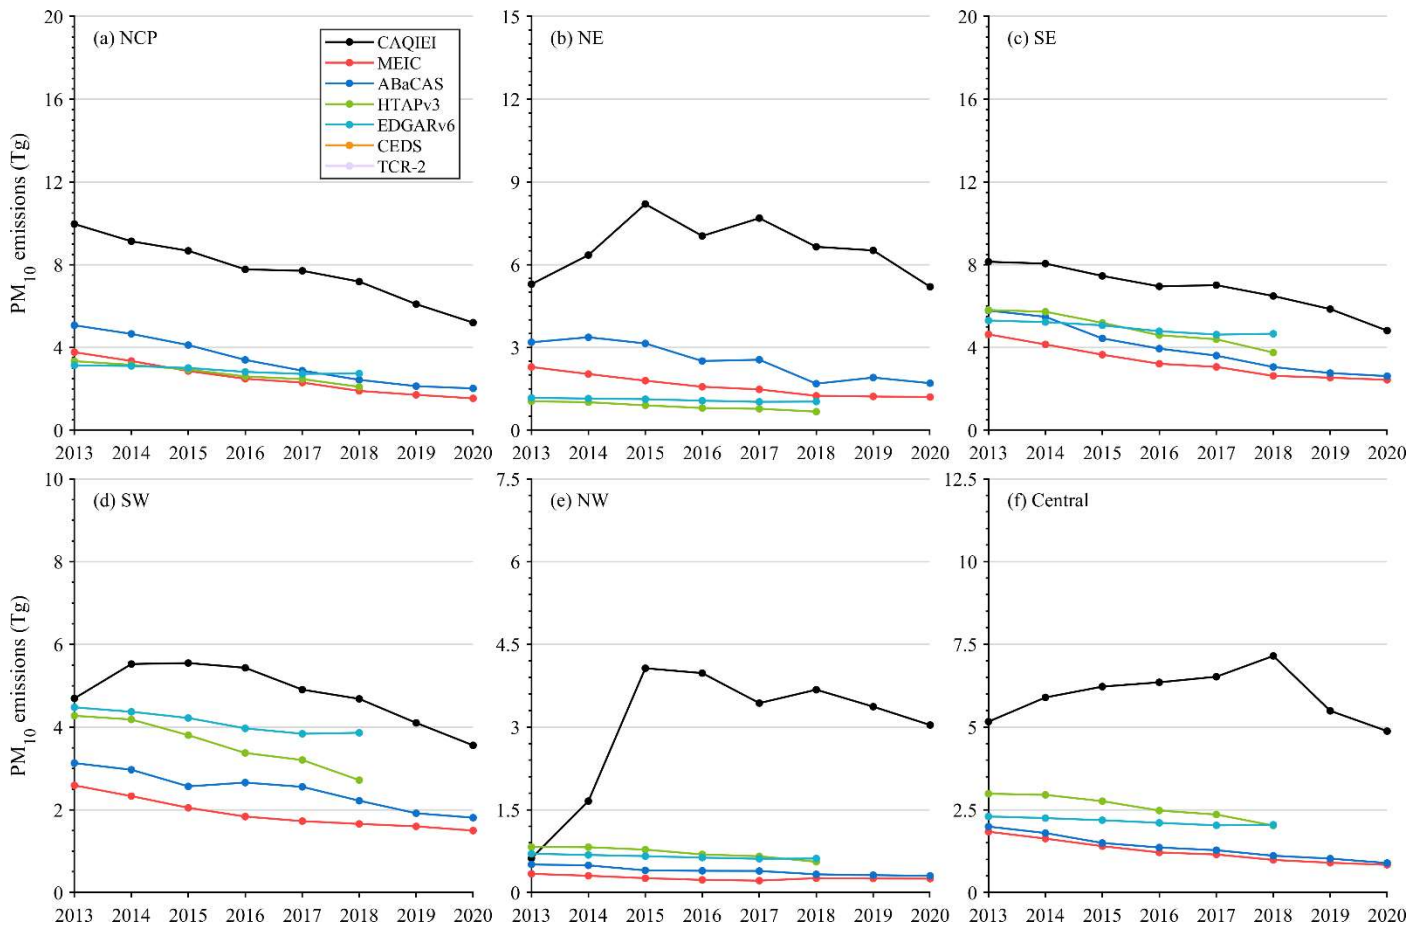

Figure S14: Same as Fig. S10 but for PM<sub>10</sub>

168  
169

170  
171



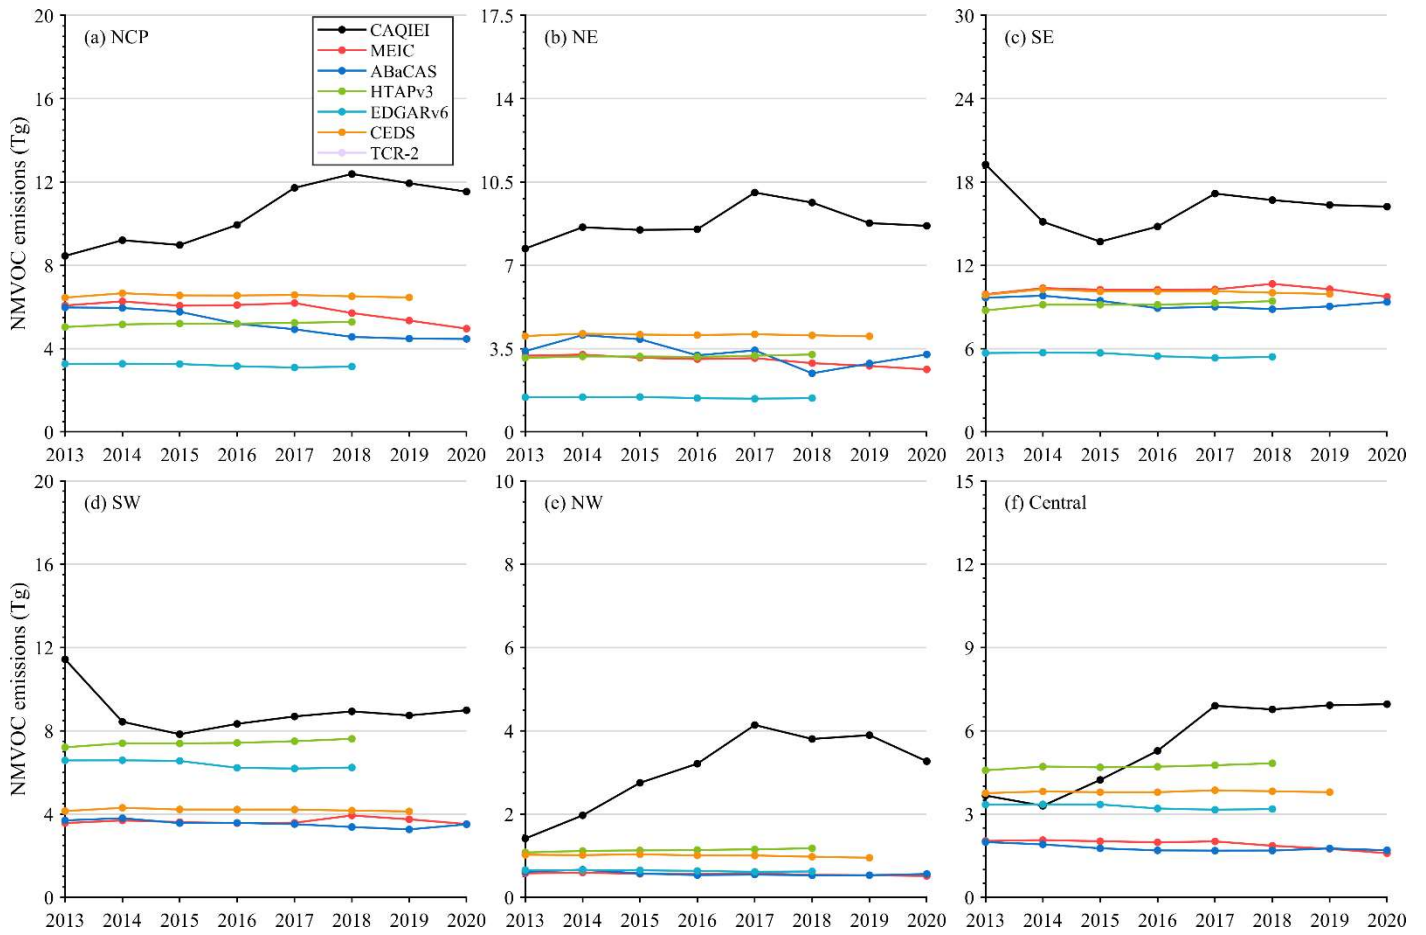

Figure S15: Same as Fig. S10 but for NMVOC.

172

173

174

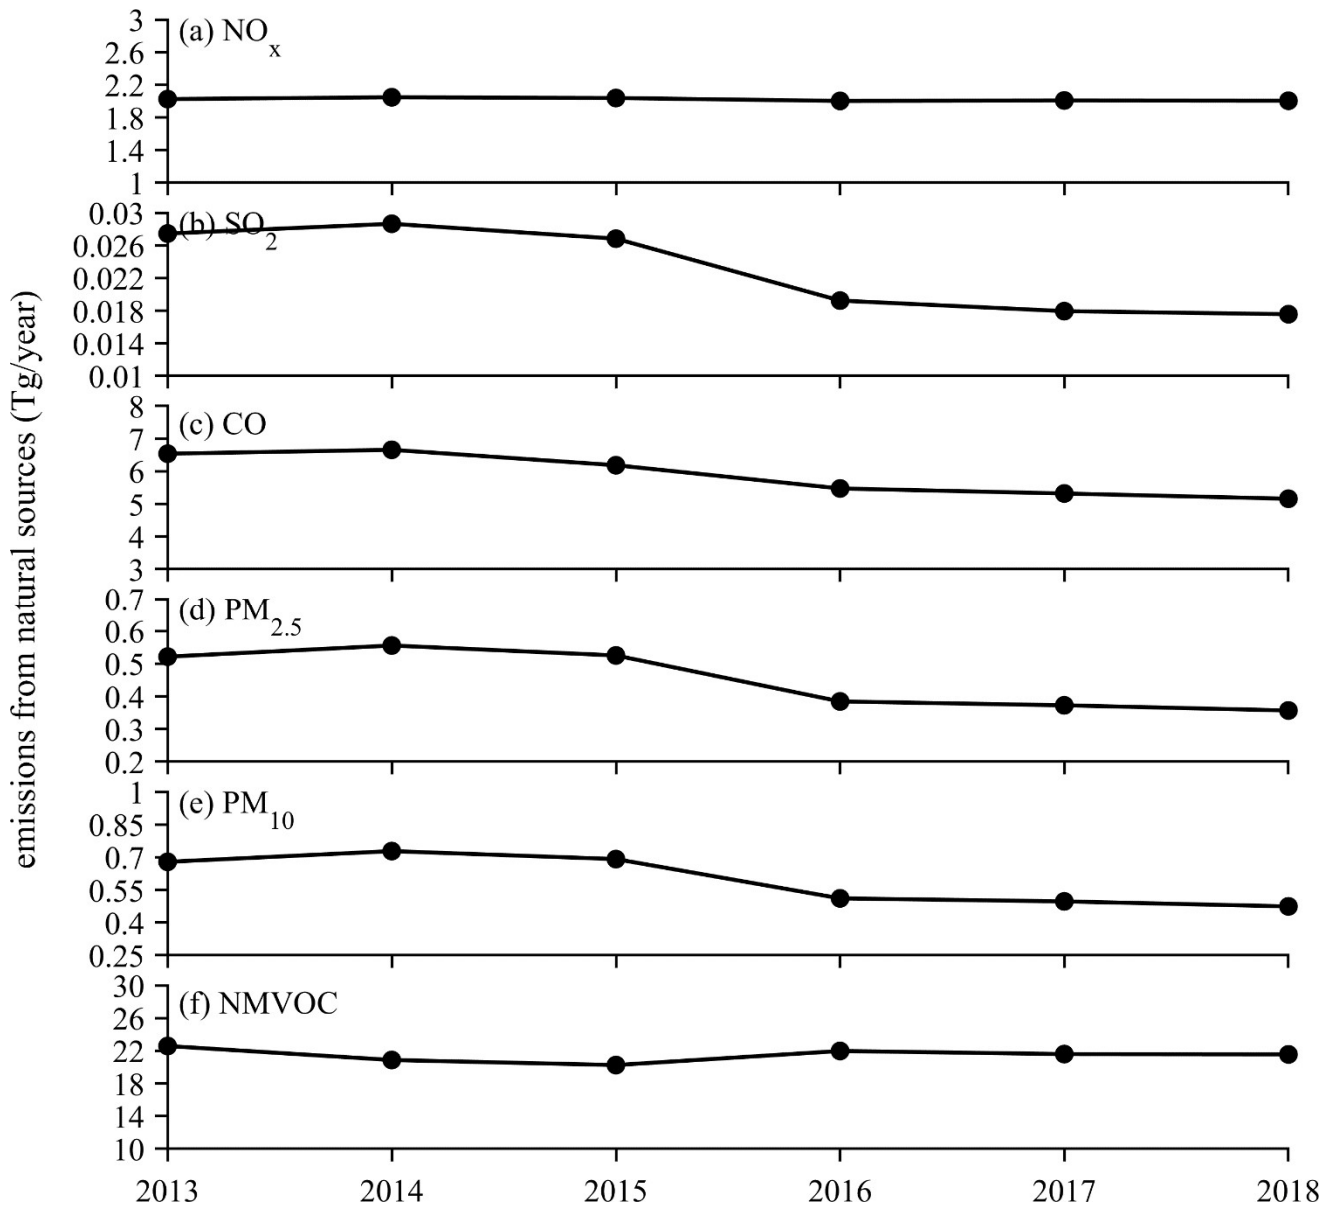

Figure S16: Time series of annual natural emissions of (a) NO<sub>x</sub>, (b) SO<sub>2</sub>, (c) CO, (d) PM<sub>2.5</sub>, (e) PM<sub>10</sub> and (f) NMVOC in China from 2013 to 2018. The considered natural sources includes the biogenic, biomass burning and soil emissions.

175  
176  
177  
178

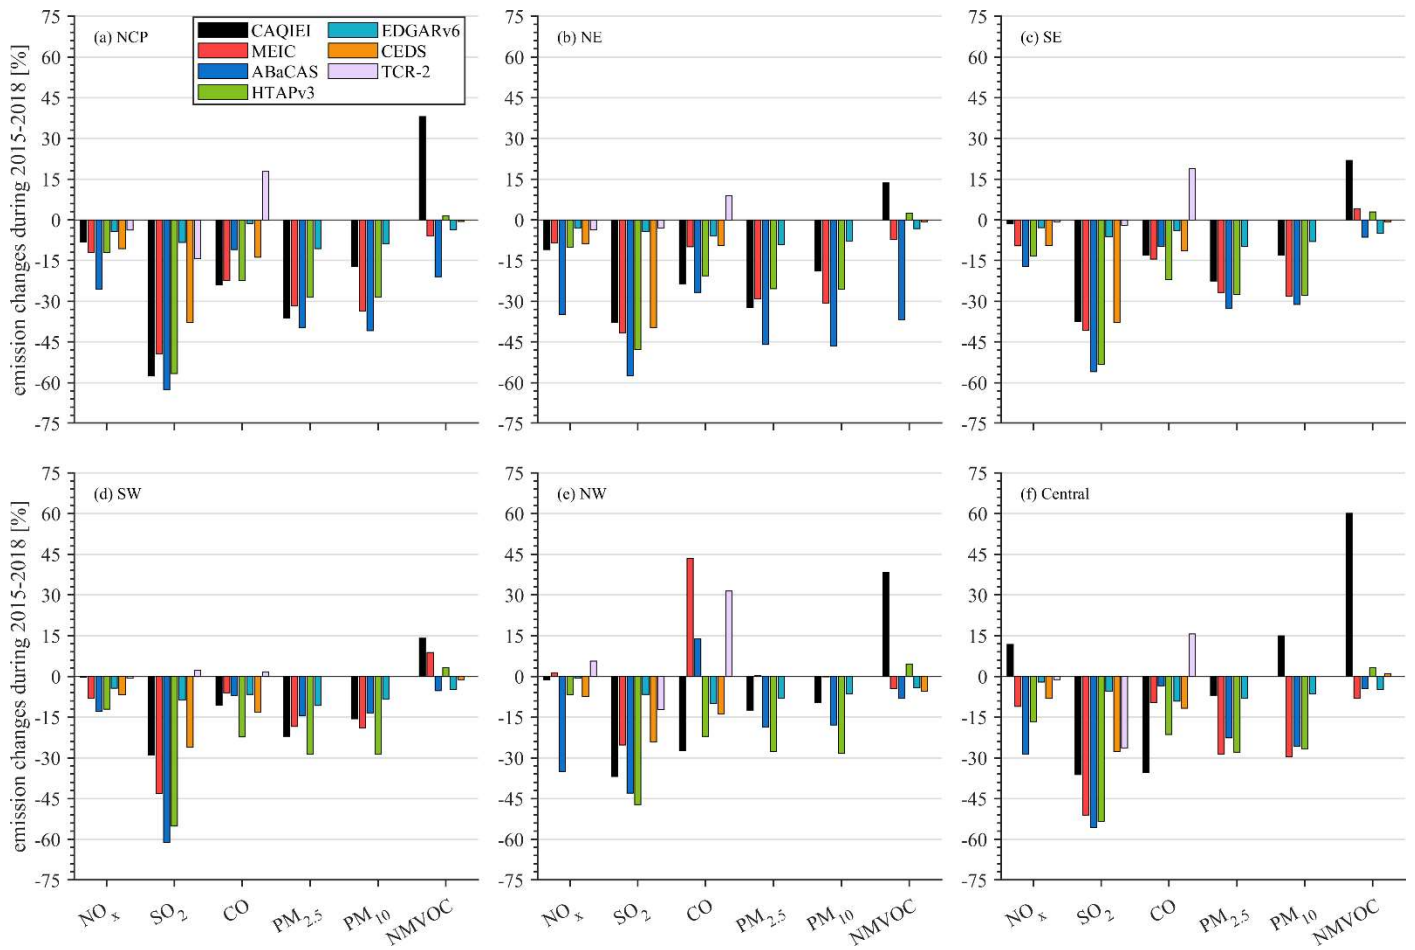

179

180

**Figure S17: Comparisons of the calculated emission changes of NO<sub>x</sub>, SO<sub>2</sub>, CO, PM<sub>2.5</sub>, PM<sub>10</sub>, and NMVOCs over (a) NCP, (b) NE, (c) SE, (d) SW, (e) NW and (f) Central regions of China from 2015 to 2018 between CAQIEI and previous inventories.**

182

183

184

NCP

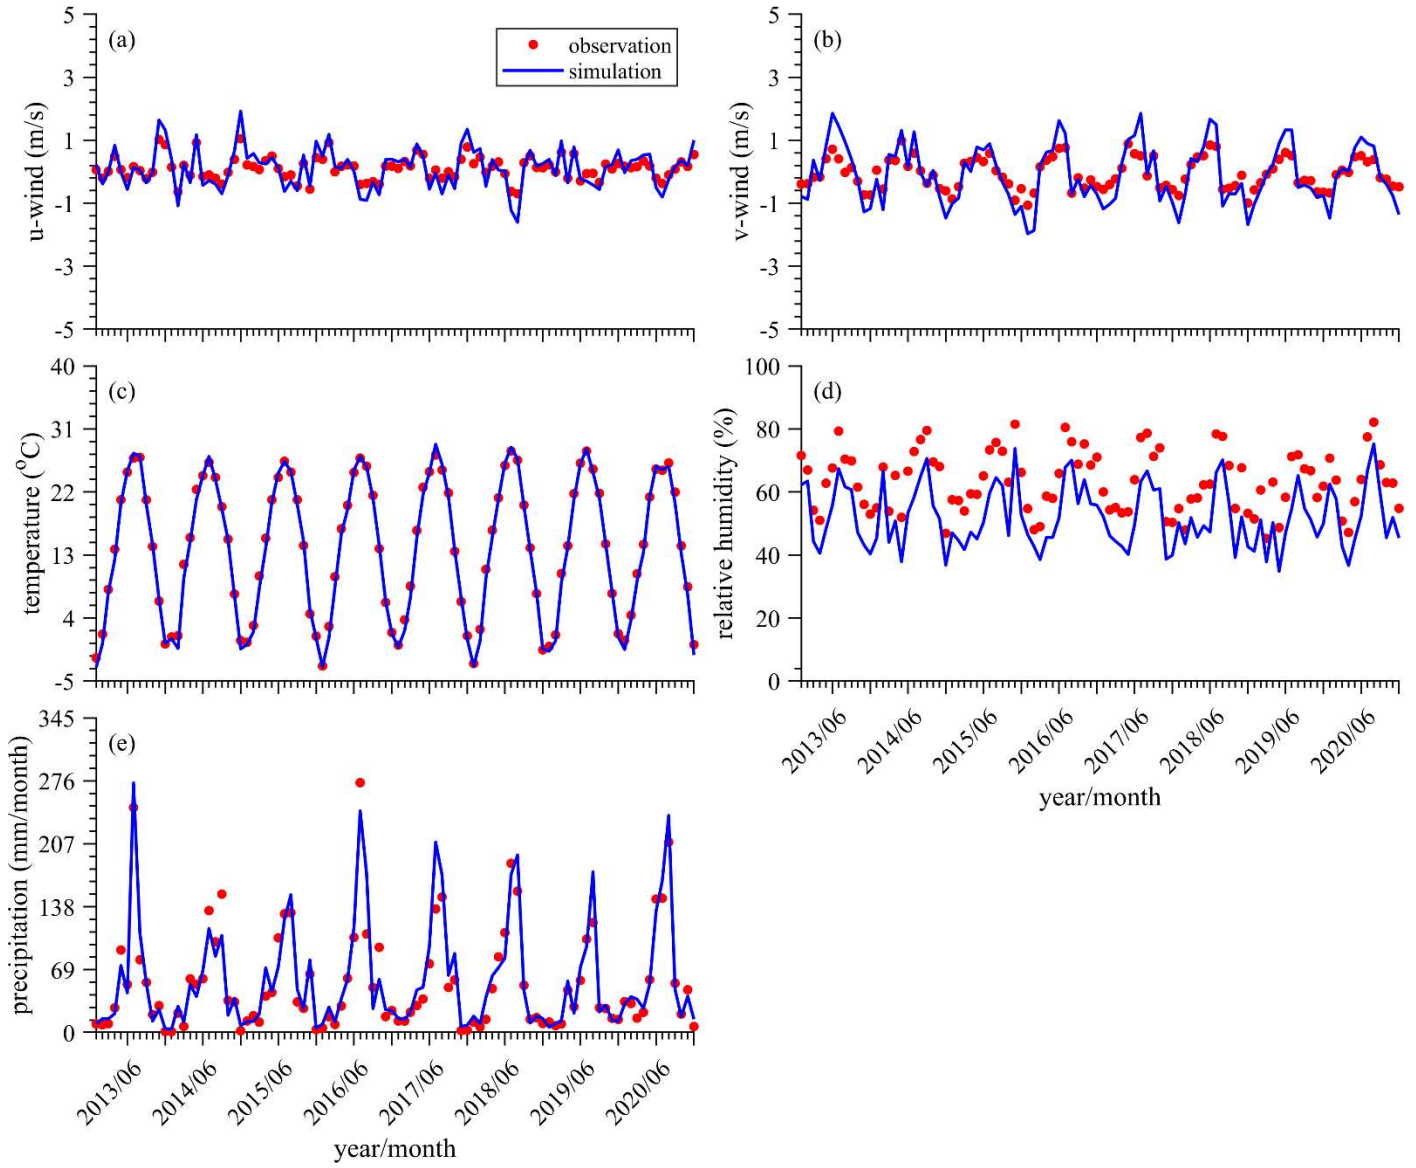

185  
186  
187

**Figure S18: Timeseries of observed (red dots) and simulated (blue line) monthly values of (a) zonal wind, (b) meridional wind, (c) temperature, (d) relative humidity and (e) precipitation over NCP region from Jan 2013 to Dec 2020.**

NE

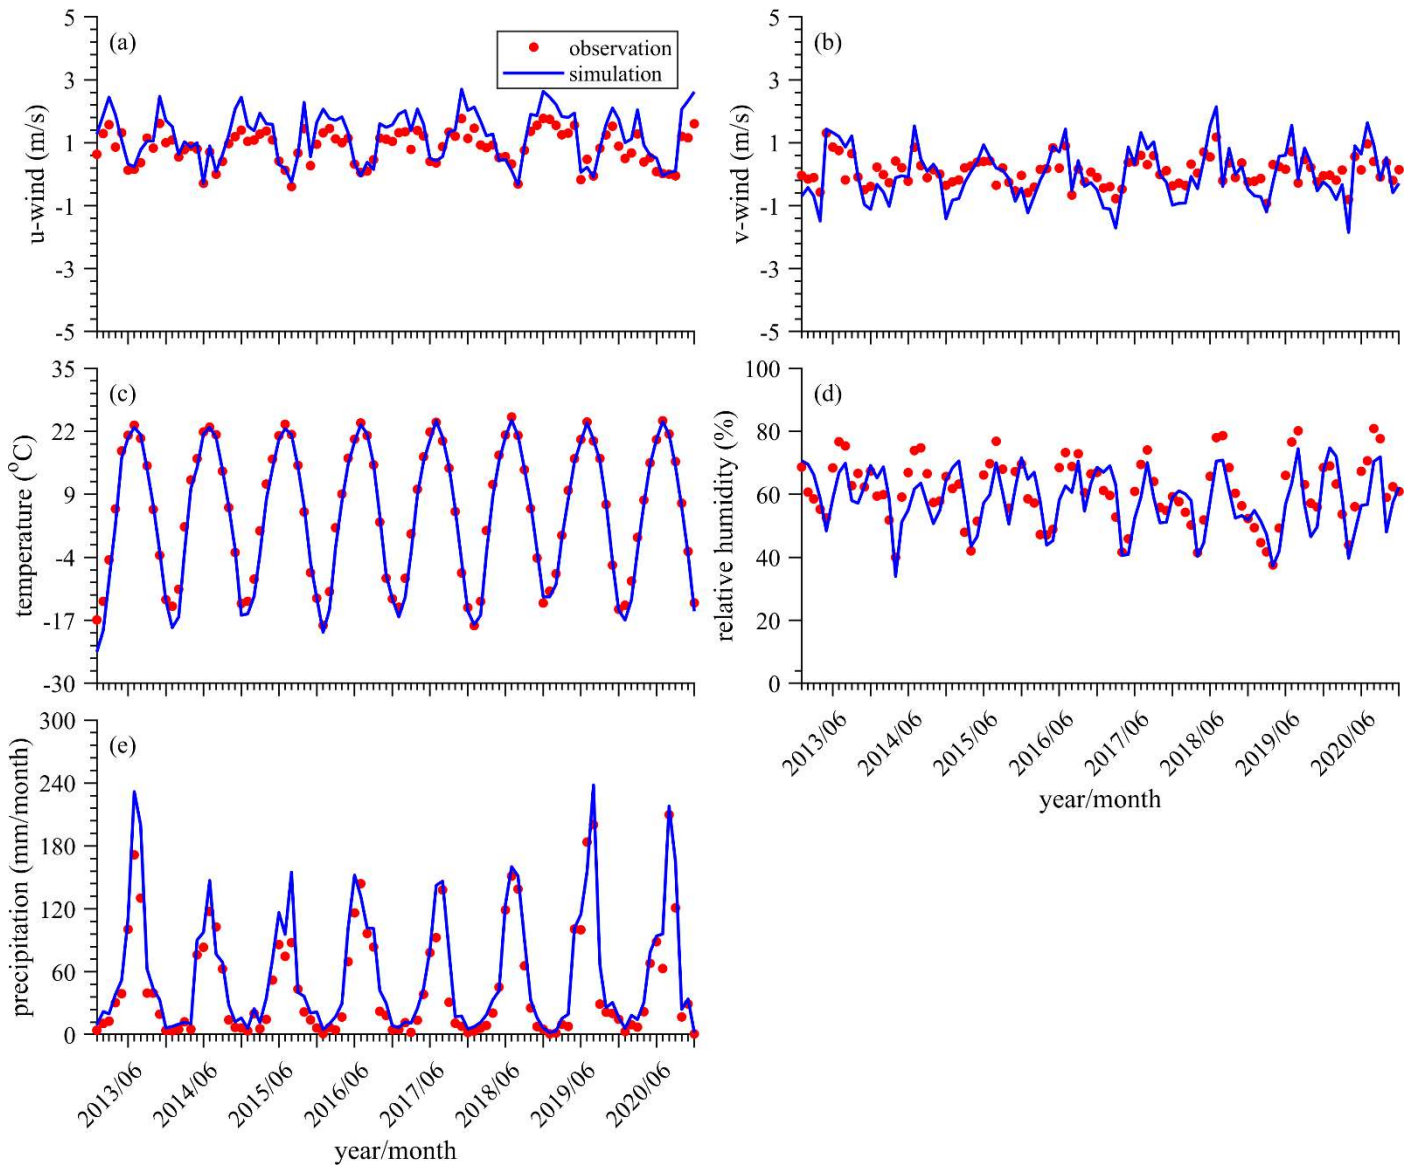

188

189

Figure S19: Same as in Figure S18 but over the NE region.

190

SE

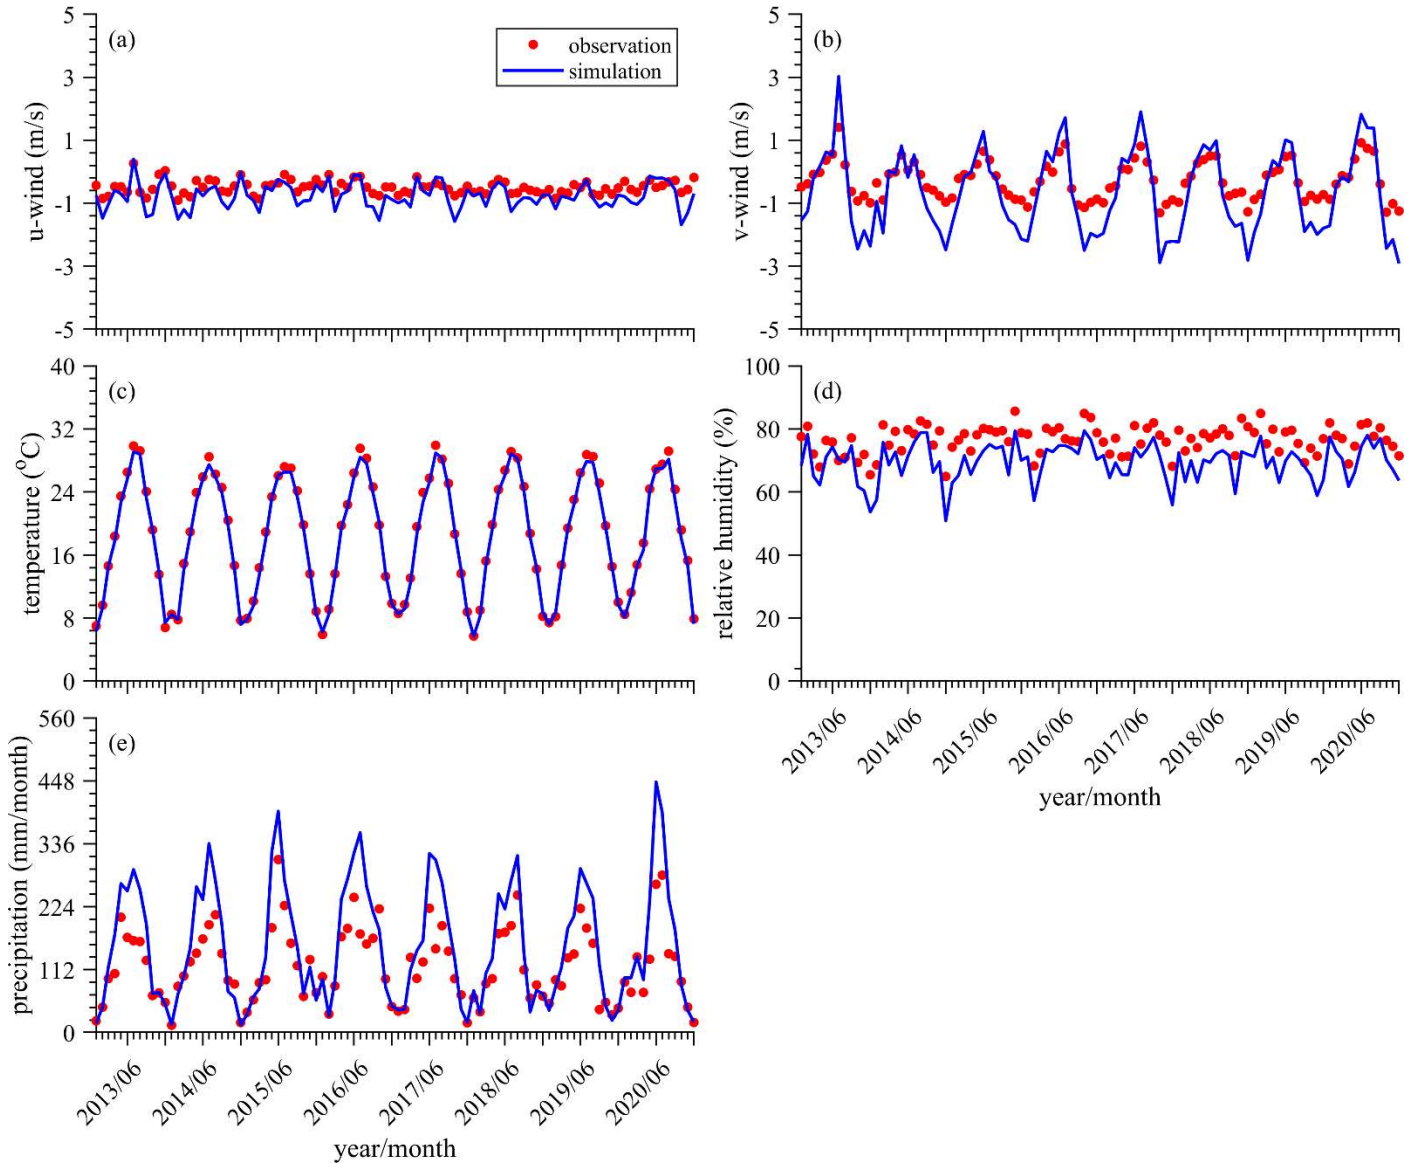

191

192

Figure S20: Same as in Figure S18 but over the SE region.

193

SW

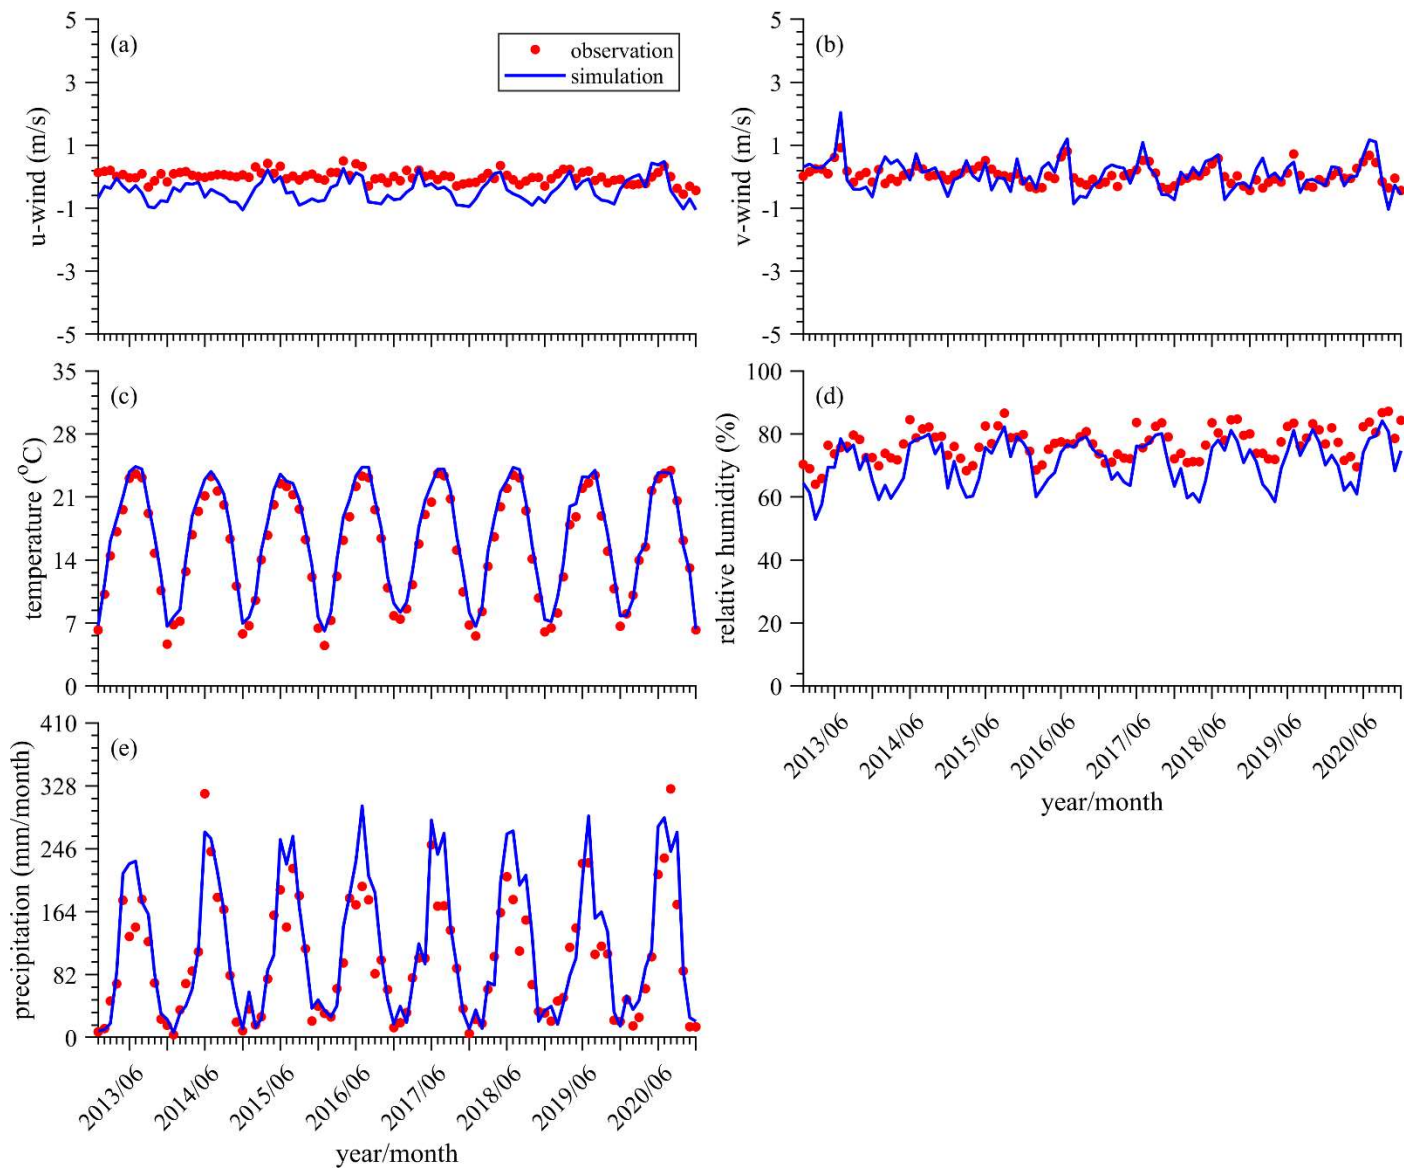

194

195

Figure S21: Same as in Figure S18 but over the SW region.

196

NW

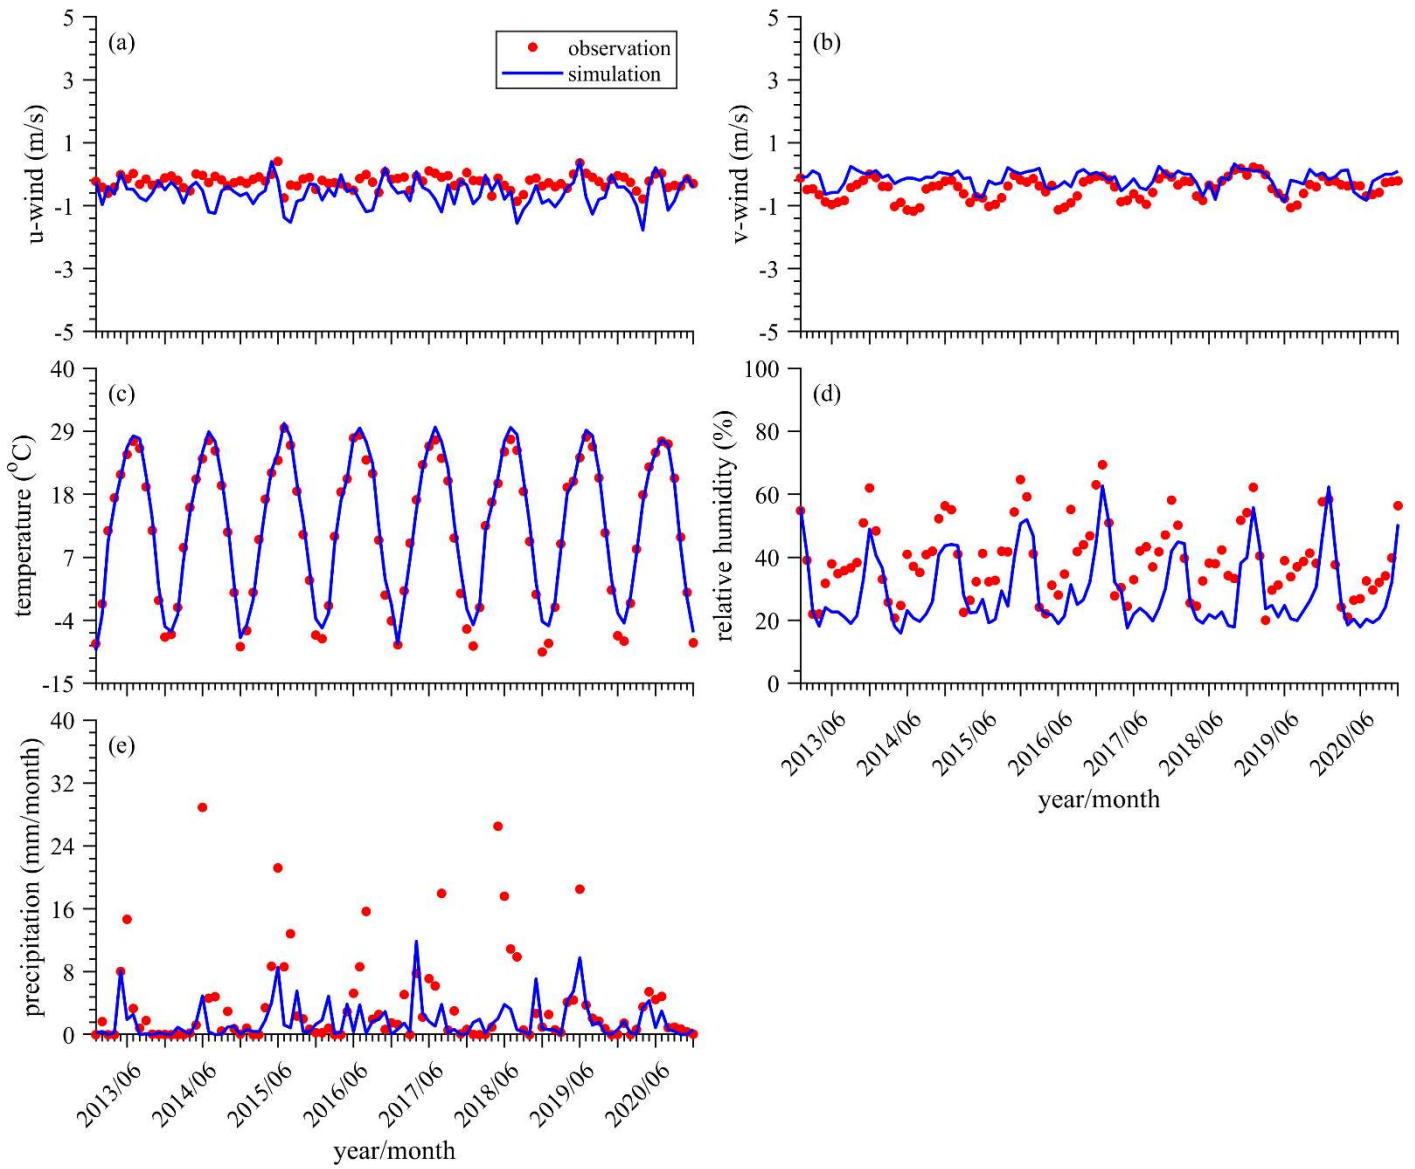

197

198

Figure S22: Same as in Figure S18 but over the NW region.

199



Central

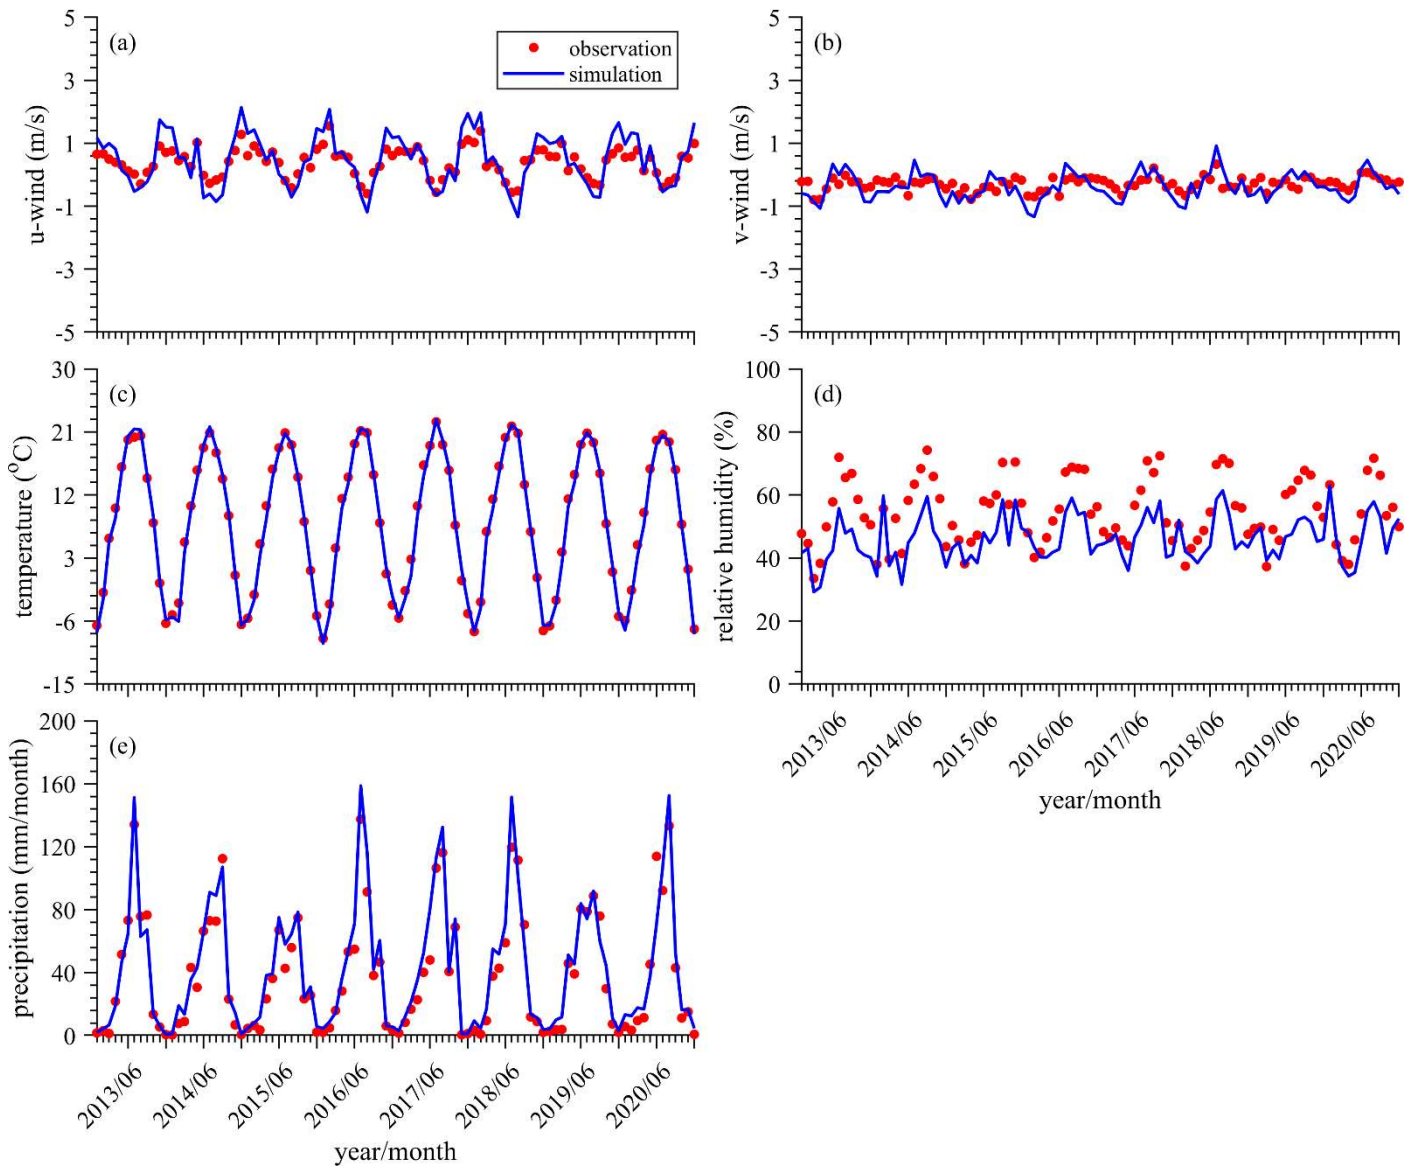

200

201

Figure S23: Same as in Figure S18 but over the Central region.

202

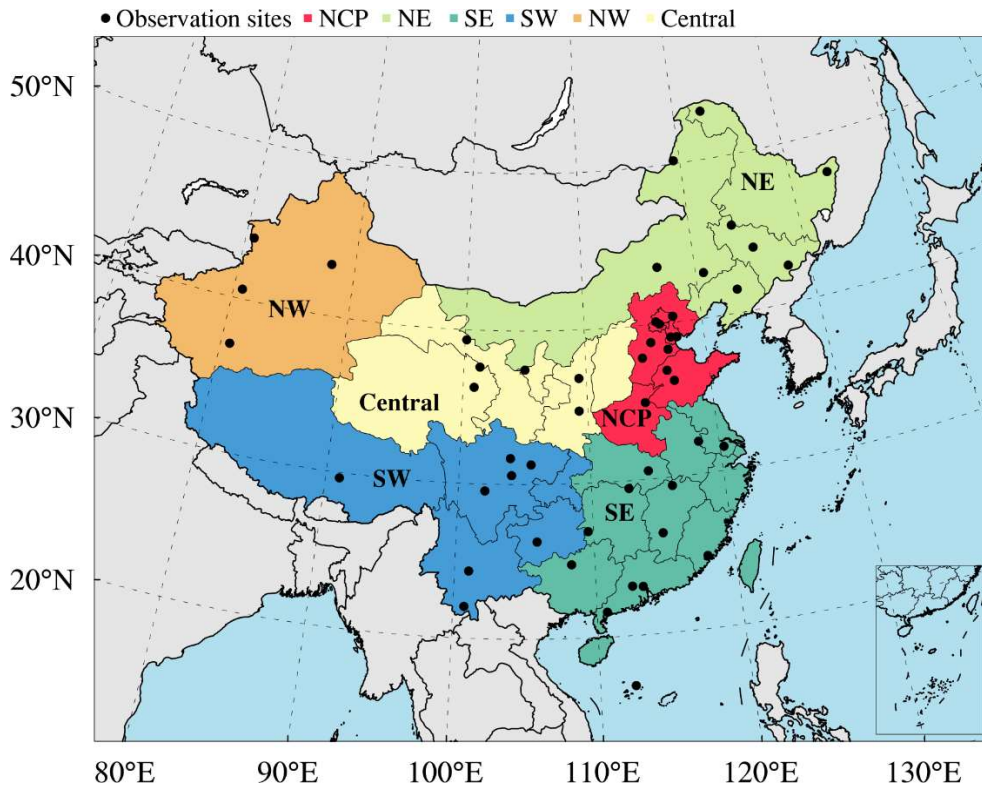

203  
204  
205

Figure S24: Spatial distribution of meteorological observation sites used in the evaluation of meteorology simulations over different regions of China

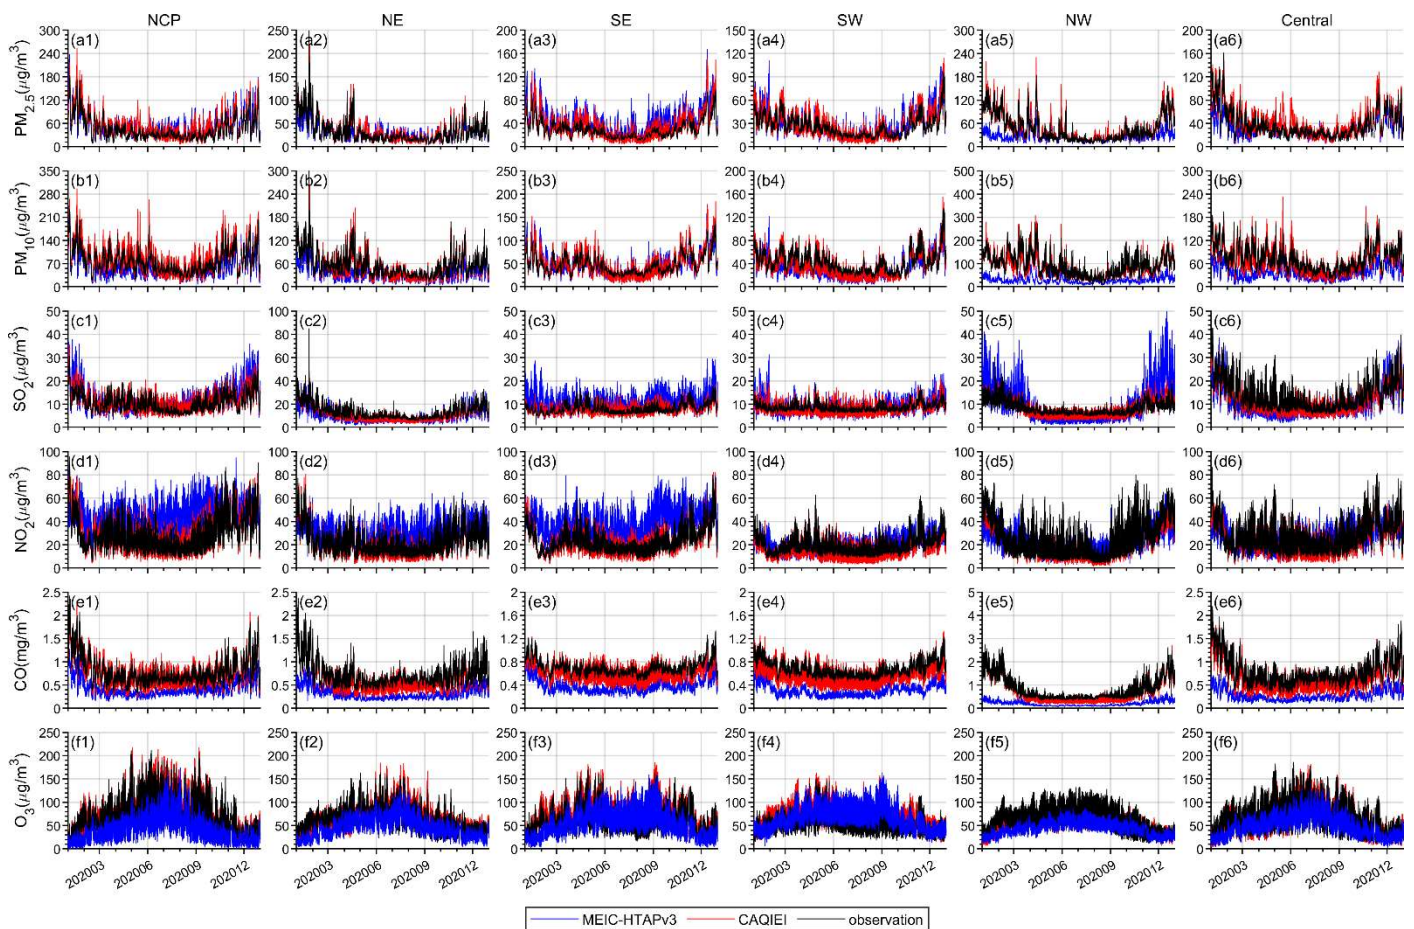

206  
207  
208  
209

Figure S25: Timeseries of observed (black lines) and simulated concentrations of different air pollutants in China driven by CAQIEI (red lines) and MEIC-HTAPv3 (blue lines) over different regions of China.
